# Supplementary material for: Development of an integrated polyoxoniobate catalyst with oxygen activation and basicity as a green catalyst for efficient aerobic oxidation of aldehydes at room temperature
Source: Royal Society of Chemistry journal article supplement (doi:10.1039/d5gc01576f), 2025-01-01

## Supplementary Information

### Development of an integrated polyoxoniobate catalyst with oxygen activation and basicity as a green catalyst for efficient aerobic oxidation of aldehydes at room temperature

Yan-Ru Li, Chun-Xia Chen, Ke-Xin Qi, Cai Sun\* and Shou-Tian Zheng\*

<sup>a</sup>Fujian Provincial Key Laboratory of Advanced Inorganic Oxygenated Materials, College of Chemistry, Fuzhou University, Fuzhou, Fujian, 350108, China

E-mails: [csun@fzu.edu.cn](mailto:csun@fzu.edu.cn) (C. Sun); [stzheng@fzu.edu.cn](mailto:stzheng@fzu.edu.cn) (S.-T. Zheng)

#### Table of Contents

|                                                          |    |
|----------------------------------------------------------|----|
| 1. General Information.....                              | 2  |
| 2. Synthesis of Catalysts and Starting Materials .....   | 3  |
| 3. Optimization of Reaction Conditions.....              | 5  |
| 4. The Scope of Aldehydes .....                          | 6  |
| 5. Gram-scale Reaction .....                             | 10 |
| 6. Investigation of Reaction Mechanism.....              | 11 |
| 7. Characters of Catalysts.....                          | 16 |
| 8. Calculation Section.....                              | 34 |
| 9. References.....                                       | 35 |
| 10. <sup>1</sup> H and <sup>13</sup> C NMR Spectra ..... | 36 |

## 1. General Information

The Fourier transform infrared (FT-IR) spectra were recorded in the 400-4000  $\text{cm}^{-1}$  spectral region using a Nicolet IS50 spectrometer. Phase identification was performed through powder X-ray diffraction (PXRD) measurements on a Rigaku MiniFlex 600 system with Cu K $\alpha$  radiation ( $\lambda = 1.54056 \text{ \AA}$ ), scanning across the  $2\theta$  range of 5-50°. Thermal stability was evaluated via thermogravimetric analysis (TGA) using a Mettler Toledo TGA/SDTA 851<sup>e</sup> thermal analyzer under ambient atmosphere, with temperature ramping from 30 °C to 800 °C at 10 °C/min. Morphological characterization and elemental distribution mapping were achieved using a Zeiss Sigma 300 field-emission scanning electron microscope (FE-SEM) equipped with energy-dispersive X-ray spectroscopy (EDS). The gas adsorption properties ( $\text{N}_2$ ) and specific surface area of  $\text{Co-Ti}_2\text{Nb}_8$  were evaluated using a Micromeritics ASAP 2020 accelerated surface area and porosimetry analyzer. Temperature control was achieved through cryogenic bath: 77 K using liquid nitrogen.  $^1\text{H}$  (400 MHz) and  $^{13}\text{C}$  (100 MHz) NMR spectra were recorded using a JEOL ECZ400 (400 MHz) spectrometer and Bruker AV-400 (400 MHz). Proton chemical shifts are reported relative to the residual solvent peak (DMSO at 2.50 ppm). Carbon chemical shifts are reported relative to DMSO at 39.5 ppm. Data are represented as follows: chemical shift, multiplicity (br = broad, s = singlet, d = double, t = triplet, q = quartet, m = multiplet), coupling constants in Hertz (Hz), integration. Mass spectra were recorded on a SHIMADZU GCMS-QP2050 equipped with an SH-I-5Sil MS Cap Column (30m, 0.25mm ID, 0.25 $\mu\text{m}$ ).  $\text{H}_2\text{O}$  was deionized. Other reagents were purchased from commercial sources and used without further purification.

## 2. Synthesis of Catalysts and Starting Materials

### Synthesis of $[\text{Co}(\text{en})_3]_3[\text{Ti}_2\text{Nb}_8\text{O}_{28}](\text{OH})\cdot 11\text{H}_2\text{O}$ (Co-Ti<sub>2</sub>Nb<sub>8</sub>)

The compound Co-Ti<sub>2</sub>Nb<sub>8</sub> was synthesized based on the literature method.<sup>1</sup> A mixture of  $\text{K}_7\text{H}[\text{Nb}_6\text{O}_{19}]\cdot 13\text{H}_2\text{O}$  (0.666 g, 0.486 mmol),  $\text{Co}(\text{Ac})_2\cdot 4\text{H}_2\text{O}$  (0.150 g, 0.612 mmol),  $\text{K}_2\text{TiF}_6$  (0.156 g, 0.650 mmol),  $\text{Li}_2\text{B}_4\text{O}_7$  (0.063 g, 0.371 mmol) and  $\text{NaHCO}_3$  (0.176 g, 2.09 mmol) was added into 8.0 mL distilled water. In addition, 0.10 mL en (en = ethylenediamine) were added into the solution, stirred for 1 hour, and then transferred to a 20 mL glass bottle. It was kept at 100 °C for 3 days, and cooled to room temperature. The long yellow strip crystals Co-Ti<sub>2</sub>Nb<sub>8</sub> were obtained by further washing with distilled water and then air-dried.

### Synthesis of $[\text{Cu}(\text{en})_2][\text{Cu}(\text{en})_2(\text{H}_2\text{O})_2]_3[\text{TiNb}_8\text{O}_{28}]\cdot 8\text{H}_2\text{O}$ (Cu-Ti<sub>2</sub>Nb<sub>8</sub>)

The compound Cu<sub>4</sub>Ti<sub>2</sub>Nb<sub>8</sub> was synthesized based on the literature method.<sup>2</sup>  $\text{K}_7\text{H}[\text{Nb}_6\text{O}_{19}]\cdot 13\text{H}_2\text{O}$  (0.100 g, 0.073 mmol),  $\text{Cu}(\text{NO}_3)_2\cdot 3\text{H}_2\text{O}$  (0.100 g, 0.414 mmol), titanium isopropoxide (0.300 mL, 0.989 mmol) were mixed in 8.0 mL H<sub>2</sub>O. Then 0.25 mL en were added to the mixture. The mixture was transferred into a 23 mL capacity PTFE-lined autoclave and heated at 140 °C for 3 days. After cooling to room temperature, purple block-like crystals were obtained, washed with distilled water, and then air-dried.

### Synthesis of $\text{Na}_8[\text{Ti}_2\text{Nb}_8\text{O}_{28}]\cdot 34\text{H}_2\text{O}$ (Na-Ti<sub>2</sub>Nb<sub>8</sub>)

The compound Na-Ti<sub>2</sub>Nb<sub>8</sub> was synthesized based on the literature method.<sup>3</sup> Amorphous niobium pentoxide (0.350 g, 1.316 mmol) and titanium isopropoxide (0.267 g, 0.880 mmol) are combined in an 8 mL NaOH solution (0.34 M) in a 23 mL Teflon-lined Parr pressure vessel and stirred for approximately 20 min. The closed vessel is placed in an oven at 200–220 °C for 5–20 h. The product is a mixture of white powder and irregular-shaped, colorless crystals that dehydrate quickly (become cracked and translucent) when removed from the mother liquor. To obtain a pure batch of crystals, the product mixture is stirred in de-ionized water. The crystals dissolve and the white powder is filtered off. A clear solution is obtained from this treatment that contains the dissolved crystals. Slow diffusion of methanol into the solution at room temperature produces well-formed crystals.

### Synthesis of $\text{Co}(\text{en})_3\text{ClSO}_4$

The compound  $\text{Co}(\text{en})_3\text{ClSO}_4$  was synthesized based on the literature method.<sup>4</sup> In a 200 mL beaker, sequentially add of concentrated en (2.300 mL, 16.547 mmol), concentrated HCl (2.500 mL, 29.750 mmol) and an  $\text{CoSO}_4\cdot 7\text{H}_2\text{O}$  aqueous solution (0.538 M). Add 0.500 g activated carbon and stir the mixture vigorously. Then, gradually add H<sub>2</sub>O<sub>2</sub> to the system until the solution turns orange-red, indicating that all divalent cobalt has been oxidized. Adjust the pH to 7.0 by adding HCl. Heat the mixture for 15 minutes. After heating, cool the mixture and filter to collect the solid. Allow the filtrate to stand for 2 days, during which orange-yellow crystals will form and can be extracted.

### Synthesis of $\text{H}_2[\text{Co}(\text{en})_3]_2(\text{Nb}_6\text{O}_{19})\cdot 9\text{H}_2\text{O}$ (Co-Nb<sub>6</sub>)

A mixture of  $\text{K}_7\text{H}[\text{Nb}_6\text{O}_{19}]\cdot 13\text{H}_2\text{O}$  (0.319 g, 0.233 mmol),  $\text{CoCl}_2\cdot 6\text{H}_2\text{O}$  (0.080 g, 0.336 mmol) was added into 8.0 mL distilled water. In addition, 0.2 mL en were added into the solution, stirred for 1 hour, and then transferred to a 20 mL glass bottle. It was kept at 80 °C for 3 days, and cooled to room temperature. The yellow square crystals were obtained by further washing with distilled water and air-dried.

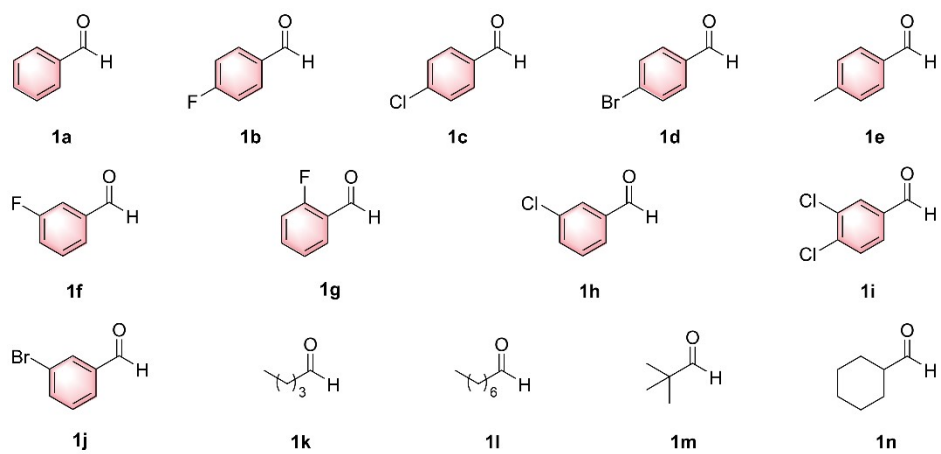

**Figure S1.** Reaction scope of aldehydes

### 3. Optimization of Reaction Conditions

**Procedure A:** To a 25 mL Schlenk tube, **1a**, Co-Ti<sub>2</sub>Nb<sub>8</sub> (0.5 mol%, 0.005 mmol), and solvent (2.0 mL) were added under 1 atm O<sub>2</sub> atmosphere. The mixture was stirred at r.t. for 1 h. After the reaction mixture was tested by GC.

**Table S1.** Screening of solvents

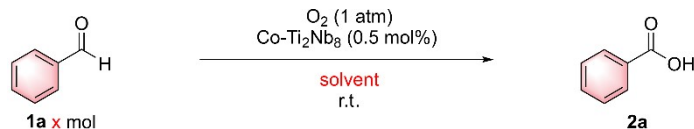

| Entry | Solvent                     | BzH/mmol | Yield (%) |
|-------|-----------------------------|----------|-----------|
| 1     | Toluene                     | 1        | 26        |
| 2     | EtOH                        | 1        | <5        |
| 3     | DCM                         | 1        | 43        |
| 4     | Acetone                     | 1        | 23        |
| 5     | H <sub>2</sub> O/MeCN (3:1) | 1        | 27        |
| 6     | H <sub>2</sub> O/MeCN (1:3) | 1        | 74        |
| 7     | H <sub>2</sub> O/Toluene    | 1        | <5        |
| 8     | H <sub>2</sub> O/EtOH       | 1        | <5        |
| 9     | H <sub>2</sub> O/MeCN       | 0.5      | 97        |
| 10    | H <sub>2</sub> O/MeCN       | 1        | >99       |
| 11    | H <sub>2</sub> O/MeCN       | 1.5      | 92        |
| 12    | H <sub>2</sub> O/MeCN       | 2        | 82        |

## 4. The Scope of Aldehydes

**Procedure B:** To a 25 mL Schlenk tube, **1** (1.00 mmol), Co-Ti<sub>2</sub>Nb<sub>8</sub> (0.5 mol%, 0.005 mmol) and H<sub>2</sub>O/ MeCN (2.0 mL) were added under 1 atm O<sub>2</sub> atmosphere. The mixture was stirred at rt for 1 h. Then, the reaction mixture was added 40 mg of NaOH (1.00 mmol) and stir for 5 minutes. Next, followed by 3 ml of DCM to wash the aqueous phase, repeating this step three times. Adjust the pH of the aqueous phase to 2 using 0.1 M HCl, and then wash with 5 ml of ether, again repeating this step three times. Collect the ether (a total of 15 ml) and add anhydrous sodium sulfate to remove any residual water, shaking the mixture and allowing it to stand for 20 minutes. Finally, filter out the anhydrous sodium sulfate solid and rotary evaporate the collected filtrate to obtain the product. The crude mixture also can be purified by column chromatography on silica gel.

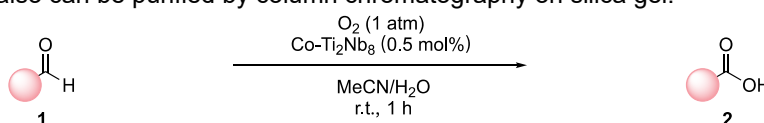

### Synthesis of compound 2a

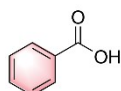

Benzoic acid (**2a**), white crystal, 121.93 mg, 99%.

**<sup>1</sup>H NMR (400 MHz, DMSO)**  $\delta$  7.48 (t,  $J$  = 7.6 Hz, 2H), 7.59 (t,  $J$  = 7.6 Hz, 1H), 7.95 (d,  $J$  = 7.6 Hz, 2H), (COOH is missing).

**<sup>13</sup>C NMR (100 MHz, DMSO)**  $\delta$  128.7 (2C), 129.4 (2C), 130.9, 133.0, 167.6.

### Synthesis of compound 2b

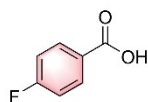

*p*-Fluorobenzoic acid (**2b**), white powder, 138.7 mg, 99%.

**<sup>1</sup>H NMR (400 MHz, DMSO)**  $\delta$  7.28–7.34 (m, 2H), 7.97–8.02 (m, 2H), 13.05 (br, 1H).

**<sup>13</sup>C NMR (100 MHz, DMSO)**  $\delta$  115.6, 115.8, 127.4, 132.16, 132.25, 163.8, 166.3, 166.5.

### Synthesis of compound 2c

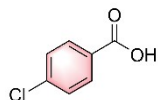

*p*-Chlorobenzoic acid (**2c**), white powder, 150.31 mg, 96%.

**<sup>1</sup>H NMR (400 MHz, DMSO)**  $\delta$  7.54 (d,  $J$  = 8.4 Hz, 2H), 7.93 (d,  $J$  = 8.4 Hz, 2H), 13.18 (br, 1H).

**<sup>13</sup>C NMR (100 MHz, DMSO)**  $\delta$  128.7 (2C), 129.7, 131.2 (2C), 137.8, 166.5.

### Synthesis of compound 2d

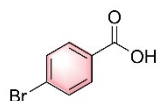

*p*-Bromobenzoic acid (**2d**), white powder, 180.93 mg, 90%.

**<sup>1</sup>H NMR (400 MHz, DMSO)** δ 7.70 (d, *J* = 8.0 Hz, 2H), 7.86 (d, *J* = 8.0 Hz, 2H), 13.20 (br, 1H).

**<sup>13</sup>C NMR (100 MHz, DMSO)** δ 127.0, 130.0, 131.4 (2C), 131.8 (2C), 166.7.

### Synthesis of compound 2e

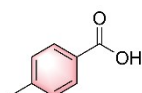

*p*-methylbenzoic acid (**2e**) (for 4 h), white powder, 134.81 mg, 99%.

**<sup>1</sup>H NMR (400 MHz, DMSO)** δ 2.34 (s, 3H), 7.27 (d, *J* = 8.0 Hz, 2H), 7.84 (d, *J* = 8.0 Hz, 2H), 12.82 (br, 1H).

**<sup>13</sup>C NMR (100 MHz, DMSO)** δ 21.2, 128.1, 129.2 (2C), 129.4 (2C), 143.1, 167.5.

### Synthesis of compound 2f

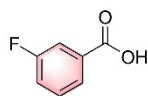

*m*-Fluorobenzoic acid (**2f**) (for 4 h), white powder, 125.13 mg, 90%.

**<sup>1</sup>H NMR (400 MHz, DMSO)** δ 7.44–7.93 (m, 1H), 7.52–7.58 (m, 1H), 7.63–7.66 (m, 1H), 7.77–7.79 (m, 1H), 13.26 (br, 1H).

**<sup>13</sup>C NMR (100 MHz, DMSO)** δ 115.7, 115.9, 119.8, 120.0, 125.49, 125.52, 130.8, 130.9, 133.26, 133.33, 160.8, 163.3, 166.27, 166.30.

### Synthesis of compound 2g

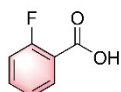

*o*-Fluorobenzoic acid (**2g**) (for 12 h), white powder, 90.38 mg, 65%.

**<sup>1</sup>H NMR (400 MHz, DMSO)** δ 7.28 (t, *J* = 8.4 Hz, 2H), 7.61 (q, *J* = 7.2 Hz, 1H), 7.87 (t, *J* = 7.6 Hz, 1H), 13.25 (br, 1H).

**<sup>13</sup>C NMR (100 MHz, DMSO)** δ 116.8, 117.1, 119.2, 119.5, 134.45, 124.49, 132.0, 134.7, 134.8, 159.9, 162.5, 165.12, 165.15.

### Synthesis of compound 2h

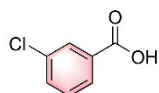

3-Chlorobenzoic acid (**2h**) (for 4 h), white powder, 128.37 mg, 82%.

**<sup>1</sup>H NMR (400 MHz, DMSO)**  $\delta$  7.53 (t,  $J$  = 8.0 Hz, 1H), 1.54–1.59 (ddd,  $J$  = 8.0, 2.0, 1.2 Hz, 1H), 7.88–7.90 (m, 2H), 13.35 (s, 1H).

**<sup>13</sup>C NMR (100 MHz, DMSO)**  $\delta$  128.0, 128.9, 130.7, 132.8, 133.4, 166.1.

### Synthesis of compound 2i

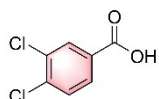

3,4-Dichlorobenzoic acid (**2i**), white powder, 160.37 mg, 84%.

**<sup>1</sup>H NMR (400 MHz, DMSO)**  $\delta$  7.75 (d,  $J$  = 8.4 Hz, 1H), 7.87 (dd,  $J$  = 8.4, 2.0 Hz, 1H), 8.04 (d,  $J$  = 2.0 Hz, 1H), (COOH is missing).

**<sup>13</sup>C NMR (100 MHz, DMSO)**  $\delta$  129.4, 131.0, 131.1, 131.5, 131.6, 135.9, 165.5.

### Synthesis of compound 2j

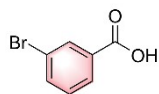

*m*-Bromobenzoic acid (**2j**) (for 4h), white powder, 178.90 mg, 89%.

**<sup>1</sup>H NMR (400 MHz, DMSO)**  $\delta$  7.43 (t,  $J$  = 8.0, 1H), 7.76 (d,  $J$  = 8.0, 1H), 7.90 (d,  $J$  = 8.0, 1H), 8.00 (s, 1H), (COOH is missing).

**<sup>13</sup>C NMR (100 MHz, DMSO)**  $\delta$  122.0, 128.5, 131.0, 132.0, 133.3, 135.8, 166.3.

### Synthesis of compound 2k

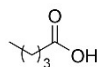

Valeric acid (**2i**), colorless oil, 101.09 mg, 99%

**<sup>1</sup>H NMR (400 MHz, DMSO)**  $\delta$  0.81 (t,  $J$  = 7.2 Hz, 3H), 1.23 (h,  $J$  = 7.6 Hz, 2H), 1.43 (p,  $J$  = 7.6 Hz, 2H), 2.13 (t,  $J$  = 7.2 Hz, 2H), (COOH is missing).

**<sup>13</sup>C NMR (100 MHz, DMSO)**  $\delta$  14.2, 22.5, 27.4, 34.2, 175.6.

### Synthesis of compound 2l

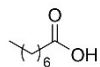

Octanoic acid (**2l**), colorless oil, 144.13 mg, 99%.

**<sup>1</sup>H NMR (400 MHz, DMSO)**  $\delta$  0.85 (t,  $J$  = 7.2 Hz, 3H), 1.20–1.28 (m, 8H), 1.48 (p,  $J$  = 7.2 Hz, 2H), 2.17 (t,  $J$  = 7.2 Hz, 2H), 11.96 (s, 1H),

**<sup>13</sup>C NMR (100 MHz, DMSO)**  $\delta$  13.9, 22.1, 24.6, 28.5, 28.6, 31.3, 33.7, 174.5.



#### Synthesis of compound 2m

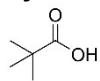

Pivalic acid (**2m**), colorless oil, 101.12 mg, 99%.

**<sup>1</sup>H NMR (400 MHz, DMSO)**  $\delta$  1.10 (s, 9H).

**<sup>13</sup>C NMR (100 MHz, DMSO)**  $\delta$  27.1, 37.8, 179.5.

#### Synthesis of compound 2n

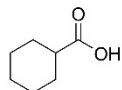

Cyclohexanecarboxylic acid (**2n**), colorless oil, 126.90 mg, 99%.

**<sup>1</sup>H NMR (400 MHz, DMSO)**  $\delta$  1.14–1.36 (m, 5H), 1.54–1.59 (m, 1H), 1.62–1.67 (m, 2H), 1.77–1.81 (m, 2H), 2.14–2.21 (m, 1H), 12.00 (s, 1H).

**<sup>13</sup>C NMR (100 MHz, DMSO)**  $\delta$  25.2 (2C), 25.7, 29.0 (2C), 42.5, 177.0.

## 5. Gram-scale Reaction

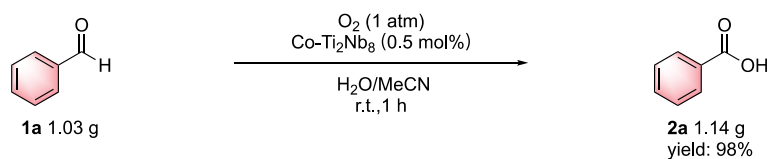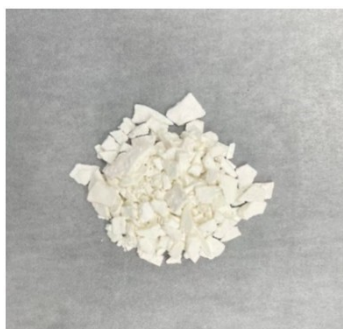

Benzaldehyde (**1a**, 1.03 g, 9.706 mmol), Co-Ti<sub>2</sub>Nb<sub>8</sub> (94.34 mg, 0.048 mmol, 0.5 mol%), acetonitrile (9.7 mL) and deionized H<sub>2</sub>O (9.7 mL) were added to a 100 mL round-bottomed flask under 1 atm O<sub>2</sub> atmosphere. The mixture was stirred at rt for 1 h. After the reaction, the mixture was filtered to remove catalyst. Then, the reaction mixture was added 400 mg of NaOH (10.00 mmol) and stir for 5 minutes. Next, followed by 20 ml of DCM to wash the aqueous phase, repeating this step three times. Adjust the pH of the aqueous phase to 2 using 0.1 M HCl, and then wash with 30 ml of ether, again repeating this step three times. Collect the ether (a total of 90 ml) and add anhydrous sodium sulfate to remove any residual water, shaking the mixture and allowing it to stand for 1 hour. Finally, filter out the anhydrous sodium sulfate solid and rotary evaporate the collected filtrate to obtain 1.14 g **2a**.

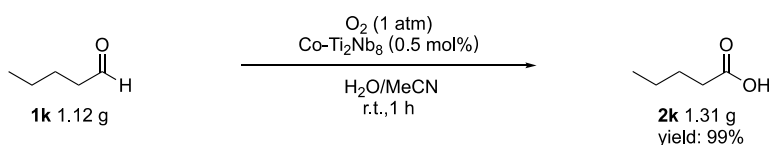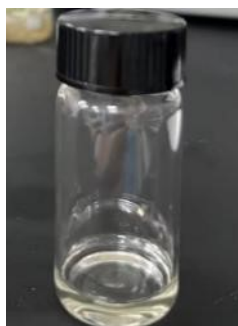

Valeraldehyde (**1k**, 1.12 g, 13.00 mmol), Co-Ti<sub>2</sub>Nb<sub>8</sub> (127.75 mg, 0.065 mmol, 0.5 mol%), acetonitrile (13 mL) and deionized H<sub>2</sub>O (13 mL) were added to a 100 mL round-bottomed flask under 1 atm O<sub>2</sub> atmosphere. The mixture was stirred at rt for 1 h. Then, using same processing method, 1.13 g **2k** was obtained.

## 6. Investigation of Reaction Mechanism

### 6.1. Investigation of active component of Co-Ti<sub>2</sub>Nb<sub>8</sub>

**Table S2.** Investigation the effects of different components of catalysts

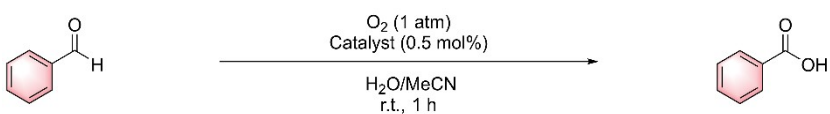

| Entry | Catalyst                              | Yield            |
|-------|---------------------------------------|------------------|
| 1     | Co-Ti <sub>2</sub> Nb <sub>8</sub>    | >99              |
| 2     | Co(OAc) <sub>2</sub>                  | 58               |
| 3     | Co(en) <sub>3</sub> ClSO <sub>4</sub> | 53               |
| 4     | Co-Nb <sub>6</sub>                    | >99 <sup>a</sup> |
| 5     | Cu-Ti <sub>2</sub> Nb <sub>8</sub>    | 0                |
| 6     | Na-Ti <sub>2</sub> Nb <sub>8</sub>    | 0                |
| 7     | Nb <sub>6</sub>                       | 0                |

<sup>a</sup>Reaction time is 6 h. Using 1 mmol benzaldehyde. Nb<sub>6</sub> is KH<sub>7</sub>Nb<sub>6</sub>O<sub>19</sub>. Solvent is 2.0 mL and the volume of ratio of H<sub>2</sub>O and MeCN is 1:1. Yields are calculated by GC.

### 6.2. Investigating the basicity of different catalysts

Weigh 0.005 mmol of each catalyst and place them into six parallel glass bottles. Add 2 mL of deionized water to each bottle, stir the mixtures under air for 1 hour, and measure the pH using a pH test pen. The experimental results are presented in Table S3. According to the experimental results, the addition of CoNb<sub>6</sub> and Co-Ti<sub>2</sub>Nb<sub>8</sub> facilitated the dissociation of H<sub>2</sub>O, leading to an increase in the pH of the solution. This increase is likely attributed to the binding of hydrolytically separated H<sup>+</sup> by niobium clusters, which act as Brønsted bases.

**Table S3.** Investigating the basicity of different catalysts

| Entry | Catalyst                              | Solubility | pH   |
|-------|---------------------------------------|------------|------|
| 1     | Co-Ti <sub>2</sub> Nb <sub>8</sub>    | insoluble  | 10.2 |
| 2     | Co(OAc) <sub>2</sub>                  | soluble    | 7.2  |
| 3     | Co(en) <sub>3</sub> ClSO <sub>4</sub> | soluble    | 5.2  |
| 4     | Co-Nb <sub>6</sub>                    | insoluble  | 9.4  |
| 5     | Cu-Ti <sub>2</sub> Nb <sub>8</sub>    | insoluble  | 7.6  |
| 6     | Na-Ti <sub>2</sub> Nb <sub>8</sub>    | insoluble  | 9.3  |
| 7     | Nb <sub>6</sub>                       | soluble    | 11.1 |

Catalyst: 0.005 mmol; H<sub>2</sub>O: 2 mL (pH = 5.5 dissolution of carbon dioxide); stir for 1 h.

### 6.3. The roles of lattice waters on the catalysts surface

All experiments were performed under standard conditions, and the corresponding yields were determined by GC. In the absence of lattice water, the Co-Nb<sub>6</sub> catalyst showed minimal reactivity within 6 h, while the reaction yield for Co-Ti<sub>2</sub>Nb<sub>8</sub> decreased to 55% for 1 h. Upon extending the reaction time to 12 h, the yield for the Co-Nb<sub>6</sub>-catalyzed reaction increased to 95%, whereas the yield for the Co-Ti<sub>2</sub>Nb<sub>8</sub>-catalyzed reaction reached 99% for 4 h. These results indicate that lattice water on the catalyst surface significantly influences the reaction rate.

**Table S4.** Investigating the roles of lattice waters on catalysts

| Entry | Catalyst                                                           | t (h) | Yield |
|-------|--------------------------------------------------------------------|-------|-------|
| 1     | Co-Nb <sub>6</sub> (with lattice H <sub>2</sub> O)                 | 1     | n.r.  |
| 2     | Co-Nb <sub>6</sub> (with lattice H <sub>2</sub> O)                 | 6     | >99   |
| 3     | Co-Nb <sub>6</sub> (no lattice H <sub>2</sub> O)                   | 6     | n.r.  |
| 4     | Co-Nb <sub>6</sub> (no lattice H <sub>2</sub> O)                   | 12    | 95    |
| 5     | Co-Ti <sub>2</sub> Nb <sub>8</sub> (with lattice H <sub>2</sub> O) | 1     | >99   |
| 6     | Co-Ti <sub>2</sub> Nb <sub>8</sub> (no lattice H <sub>2</sub> O)   | 1     | 55    |
| 7     | Co-Ti <sub>2</sub> Nb <sub>8</sub> (no lattice H <sub>2</sub> O)   | 4     | >99   |

Using 1 mmol benzaldehyde. Solvent is 2 mL and the volume of ratio of H<sub>2</sub>O and MeCN is 1:1. Yields are calculated by GC. With lattice H<sub>2</sub>O (r.t., air drying 2 days), no lattice H<sub>2</sub>O (r.t., vacuum drying 15 h), n.r. = no reaction.

#### 6.4. Time-dependent yield changes of the Co-Ti<sub>2</sub>Nb<sub>8</sub> and CoNb<sub>6</sub> systems

Six parallel reactions were carried out at the different time. To a 25 mL Schlenk tube, **1a**, Co-Ti<sub>2</sub>Nb<sub>8</sub> (0.5 mol%, 0.005 mmol), and solvent (2.0 mL) were added under 1 atm O<sub>2</sub> atmosphere. After the reaction mixture was tested by GC. Then six parallel experiments were also performed using Co-Nb<sub>6</sub> as catalyst. The experimental results showed that the induction time for Co-Ti<sub>2</sub>Nb<sub>8</sub> was significantly shorter than that for Co-Nb<sub>6</sub>. This may be attributed to the presence of hydroxyl groups (OH) bound to the Co in the Co-Ti<sub>2</sub>Nb<sub>8</sub> structure, shortening the time of obtaining OH from lattice water.

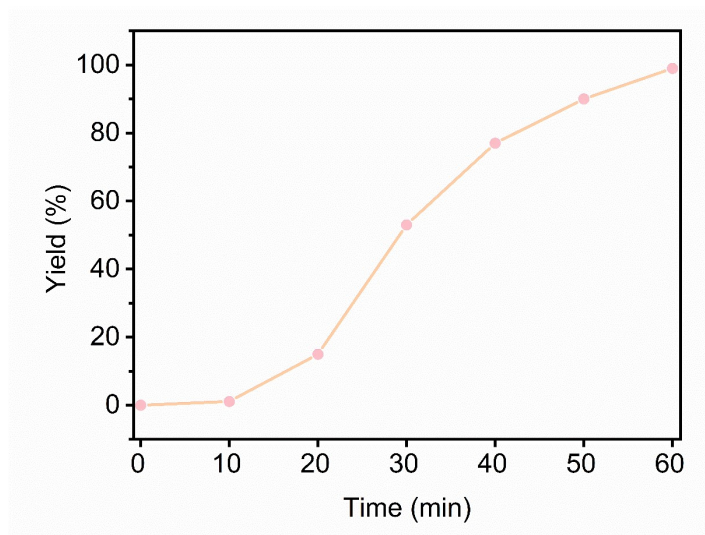

**Figure S2.** Time-dependent yield changes of the Co-Ti<sub>2</sub>Nb<sub>8</sub>.

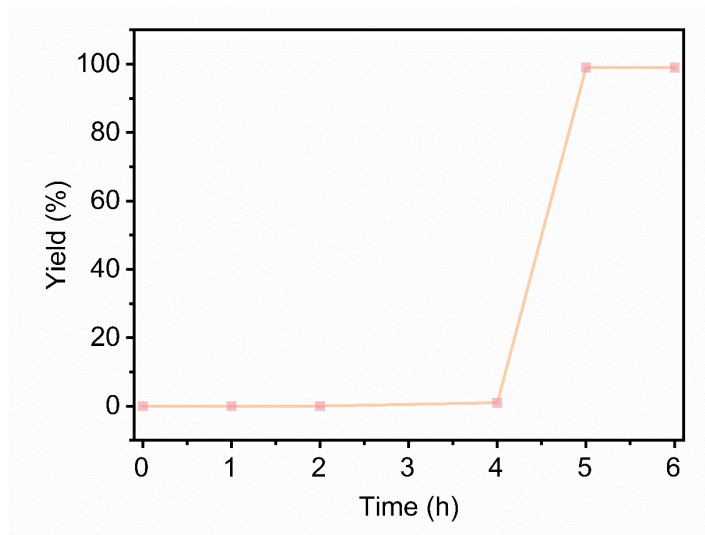

**Figure S3.** Time-dependent yield changes of the Co-Nb<sub>6</sub>.

## 6.5. Isotope labeling experiment

In two controlled experiments, benzaldehyde (0.25 mmol), Co-Ti<sub>2</sub>Nb<sub>8</sub> (0.5 mol%), and acetonitrile (0.25 mL) were added to a Schlenk tube. The difference between the experiments was the solvent used: (a) H<sub>2</sub>O and (b) H<sub>2</sub><sup>18</sup>O. After 1 hour, the oxidized product **2a** and H<sub>2</sub><sup>18</sup>O labeled **2a** were analyzed by GC-MS.

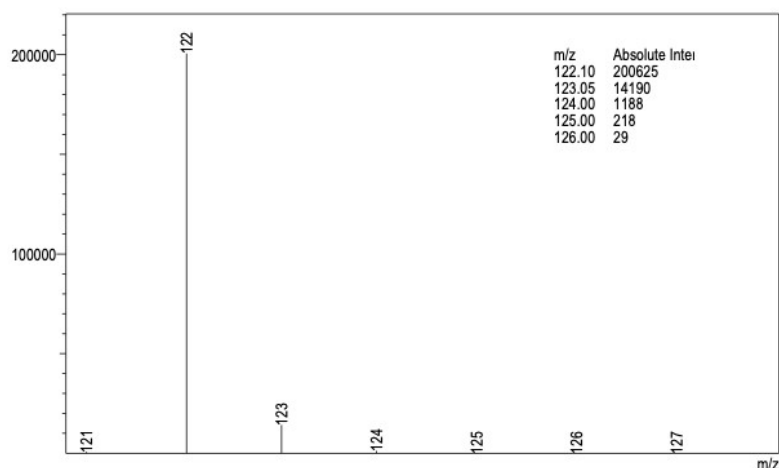

**Figure S4.** Mass spectrometry data of product that prepared in H<sub>2</sub>O/MeCN.

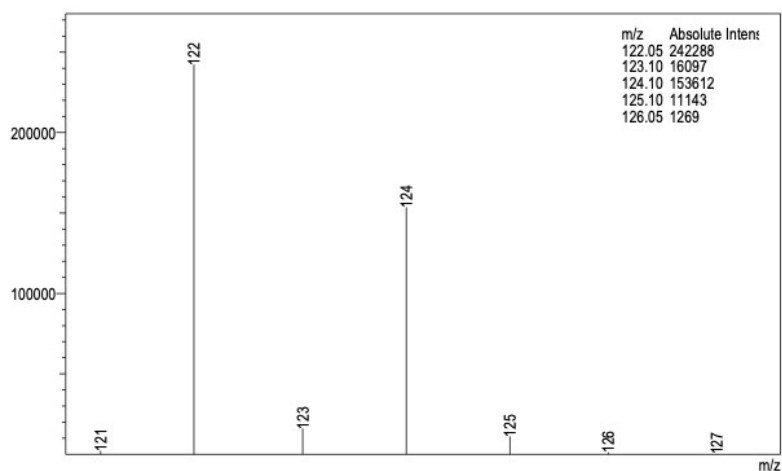

**Figure S5.** Mass spectrometry data of product that prepared in H<sub>2</sub><sup>18</sup>O/MeCN.

**Table S5.** Calculation of isotopic enrichment relative of product that prepared in H<sub>2</sub><sup>18</sup>O/MeCN

| m/z   | Relative Natural Abundance (%) | Observed Abundance (%) | Corrected Abundance (%) | Isotopic Enrichment Relative (%) |
|-------|--------------------------------|------------------------|-------------------------|----------------------------------|
| [M]+0 | 100                            | 242288                 | 242288                  | 61.2                             |
| [M]+2 | 0.59                           | 153612                 | 152183                  | 38.5                             |
| [M]+4 | 0.01                           | 1269                   | 1234                    | 0.30                             |

The ratio of the relative natural abundances of [M]+0, [M]+2, and [M]+4 was calculated based on the results from experiment (a). The observed abundances of [M]+0, [M]+2, and [M]+4 were obtained

from experiment (b). The corrected abundances were calculated using the following formulas:

For [M]<sup>+</sup><sub>2</sub>:

$$[M]^+_{2} = 153612 - (242288 \times 0.59) = 152183$$

For [M]<sup>+</sup><sub>4</sub>:

$$[M]^+_{4} = 1269 - (242288 \times 0.01) = 1234$$

## 7. Characters of Catalysts

Infrared (IR) spectra (KBr pellet) were performed on an Opus Vetex 70 FT-IR infrared spectrophotometer in the range of 400–4000  $\text{cm}^{-1}$ . Powder X-ray diffraction (PXRD) patterns were recorded on a Rigaku DMAX 2500 diffractometer with Cu  $K_\alpha$  radiation ( $\lambda = 1.54056 \text{ \AA}$ ). Simulated PXRD pattern was derived from the Mercury Version 4.3.0 software using the X-ray single crystal diffraction data. Thermogravimetric analyses were conducted using a Mettler Toledo TGA/SDTA 851e analyzer in an  $\text{N}_2$ -flow atmosphere with a heating rate of 10  $^\circ\text{C}/\text{min}$  at a temperature of 30–800  $^\circ\text{C}$ . X-ray photoelectron spectroscopy (XPS) studies were performed in a ThermoFisher ESCALAB250 X-ray photoelectron spectrometer (powered at 150 W) using Al  $K_\alpha$  radiation ( $\lambda = 8.357 \text{ \AA}$ ).

**Table S6.** Crystal and structure refinement data of  $\text{Co-Ti}_2\text{Nb}_8$  and  $\text{Cu-Ti}_2\text{Nb}_8$

|                                                                                                                           | <b>Co-Ti<sub>2</sub>Nb<sub>8</sub></b>                                                  | <b>Cu-Ti<sub>2</sub>Nb<sub>8</sub></b>                                                  |
|---------------------------------------------------------------------------------------------------------------------------|-----------------------------------------------------------------------------------------|-----------------------------------------------------------------------------------------|
| <b>Formula</b>                                                                                                            | $\text{C}_{18}\text{H}_{95}\text{Co}_3\text{N}_{18}\text{Nb}_8\text{O}_{40}\text{Ti}_2$ | $\text{C}_{16}\text{H}_{92}\text{Cu}_4\text{N}_{16}\text{Nb}_8\text{O}_{42}\text{Ti}_2$ |
| <b>Mr</b>                                                                                                                 | 2219.98                                                                                 | 2347.24                                                                                 |
| <b>Crystal size (<math>\text{mm}^3</math>)</b>                                                                            | $0.3 \times 0.1 \times 0.1$                                                             | $0.2 \times 0.2 \times 0.1$                                                             |
| <b>Crystal system</b>                                                                                                     | monoclinic                                                                              | triclinic                                                                               |
| <b>Space group</b>                                                                                                        | $P2_1/c$                                                                                | $P-1$                                                                                   |
| <b>a (<math>\text{\AA}</math>)</b>                                                                                        | 12.1776(4)                                                                              | 11.0384(14)                                                                             |
| <b>b (<math>\text{\AA}</math>)</b>                                                                                        | 38.7820(14)                                                                             | 12.372(2)                                                                               |
| <b>c (<math>\text{\AA}</math>)</b>                                                                                        | 14.7815(6)                                                                              | 15.223(3)                                                                               |
| <b><math>\alpha</math> (deg)</b>                                                                                          | 90                                                                                      | 102.841(2)                                                                              |
| <b><math>\beta</math> (deg)</b>                                                                                           | 100.796(4)                                                                              | 109.557(2)                                                                              |
| <b><math>\gamma</math> (deg)</b>                                                                                          | 90                                                                                      | 105.849(2)                                                                              |
| <b>V (<math>\text{\AA}^3</math>)</b>                                                                                      | 6857.3(4)                                                                               | 1703.8(8)                                                                               |
| <b>D<sub>calcd</sub> (<math>\text{g}/\text{cm}^3</math>)</b>                                                              | 2.150                                                                                   | 2.288                                                                                   |
| <b>Z</b>                                                                                                                  | 4                                                                                       | 2                                                                                       |
| <b>F(000)</b>                                                                                                             | 4396.0                                                                                  | 2298.0                                                                                  |
| <b>Abs coeff (<math>\text{mm}^{-1}</math>)</b>                                                                            | 2.305                                                                                   | 2.840                                                                                   |
| <b>Refl. Collected</b>                                                                                                    | 62174                                                                                   | 32377                                                                                   |
| <b>Data/params/restraints</b>                                                                                             | 15898/1144/1182                                                                         | 12139/856/12                                                                            |
| <b><math>R_1^a</math></b>                                                                                                 | 0.0830                                                                                  | 0.0545                                                                                  |
| <b><math>\omega R_2^b</math></b>                                                                                          | 0.1942                                                                                  | 0.1707                                                                                  |
| <b>GOF on <math>F^2</math></b>                                                                                            | 1.089                                                                                   | 0.912                                                                                   |
| <b><math>\Delta\rho_{\text{max}}</math> and <math>\Delta\rho_{\text{min}}</math> (<math>\text{e}/\text{\AA}^3</math>)</b> | 1.48 and -1.35                                                                          | 2.31 and -1.25                                                                          |

$$^a R_1 = \sum ||F_o| - |F_c|| / \sum |F_o|, \quad ^b \omega R_2 = \{ \sum \omega [(F_o)^2 - (F_c)^2]^2 / \sum \omega [(F_o)_2]^2 \}^{1/2}.$$



**Table S7.** Crystal and structure refinement data of Na-Ti<sub>2</sub>Nb<sub>8</sub> and Co-Nb<sub>6</sub>

|                                                                              | <b>Na-Ti<sub>2</sub>Nb<sub>8</sub></b>                          | <b>Co-Nb<sub>6</sub></b>                                                                        |
|------------------------------------------------------------------------------|-----------------------------------------------------------------|-------------------------------------------------------------------------------------------------|
| <b>Formula</b>                                                               | Na <sub>8</sub> Ti <sub>2</sub> Nb <sub>8</sub> O <sub>62</sub> | C <sub>12</sub> H <sub>68</sub> Co <sub>2</sub> N <sub>12</sub> Nb <sub>6</sub> O <sub>35</sub> |
| <b>Mr</b>                                                                    | 2014.866                                                        | 1616.10                                                                                         |
| <b>Crystal size (mm<sup>3</sup>)</b>                                         | 0.2 × 0.1 × 0.1                                                 | 0.05 × 0.05 × 0.05                                                                              |
| <b>Crystal system</b>                                                        | Triclinic                                                       | cubic                                                                                           |
| <b>Space group</b>                                                           | <i>P</i> -1                                                     | <i>Pn</i> -3 <i>m</i>                                                                           |
| <b><i>a</i> (Å)</b>                                                          | 11.7788(12)                                                     | 14.319(3)                                                                                       |
| <b><i>b</i> (Å)</b>                                                          | 12.1971(13)                                                     | 14.319(3)                                                                                       |
| <b><i>c</i> (Å)</b>                                                          | 12.5491(12)                                                     | 14.319(3)                                                                                       |
| <b><i>α</i> (deg)</b>                                                        | 97.816(2)                                                       | 90                                                                                              |
| <b><i>β</i> (deg)</b>                                                        | 113.849(2)                                                      | 90                                                                                              |
| <b><i>γ</i> (deg)</b>                                                        | 110.778(2)                                                      | 90                                                                                              |
| <b><i>V</i> (Å<sup>3</sup>)</b>                                              | 1457.1(3)                                                       | 2935.8(18)                                                                                      |
| <b><i>D</i><sub>calcd</sub> (g/cm<sup>3</sup>)</b>                           | 2.296                                                           | 1.828                                                                                           |
| <b><i>Z</i></b>                                                              | 1                                                               | 2                                                                                               |
| <b><i>F</i>(000)</b>                                                         | 940.9                                                           | 1608.0                                                                                          |
| <b>Abs coeff (mm<sup>-1</sup>)</b>                                           | 1.956                                                           | 1.768                                                                                           |
| <b>Refl. Collected</b>                                                       | 13823                                                           | 8520                                                                                            |
| <b>Data/params/restraints</b>                                                | 5036/0/359                                                      | 567/33/1                                                                                        |
| <b><i>R</i><sub>1</sub><sup>a</sup></b>                                      | 0.0306                                                          | 0.0600                                                                                          |
| <b><i>ωR</i><sub>2</sub><sup>b</sup></b>                                     | 0.0939                                                          | 0.1838                                                                                          |
| <b>GOF on <i>F</i><sup>2</sup></b>                                           | 1.043                                                           | 1.051                                                                                           |
| <b><i>Δρ</i><sub>max</sub> and <i>Δρ</i><sub>min</sub> (e/Å<sup>3</sup>)</b> | 2.75 and -2.79                                                  | 1.38 and -0.49                                                                                  |

$$^a R_1 = \sum ||F_o| - |F_c|| / \sum |F_o|, \quad ^b \omega R_2 = \{ \sum \omega [(F_o)^2 - (F_c)^2]^2 / \sum \omega [(F_o)_2]^2 \}^{1/2}.$$

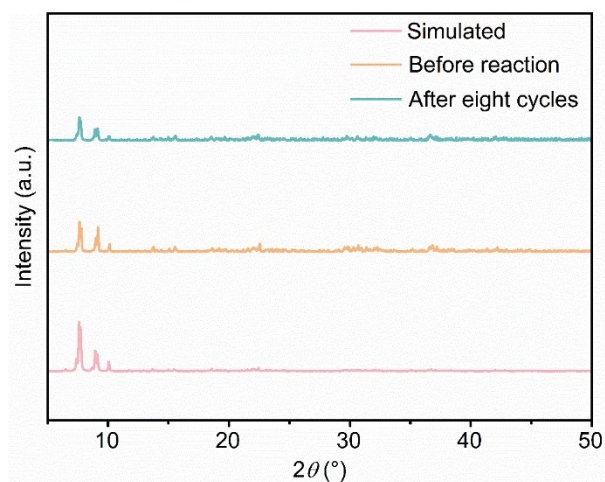

**Figure S6.** PXRD pattern spectra of  $\text{Co-Ti}_2\text{Nb}_8$  and after 8 cycles.

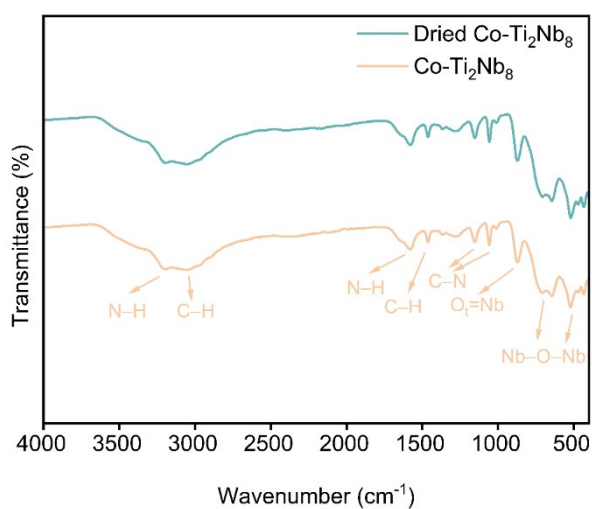

**Figure S7.** IR spectra of  $\text{Co-Ti}_2\text{Nb}_8$ .

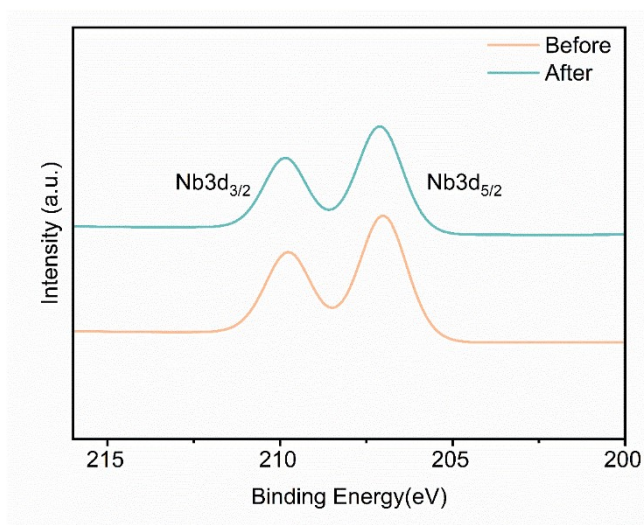

**Figure S8.** XPS ( $\text{Al K}\alpha$ ) core-level spectra for Nb 3d of the before and after 8 cycles.

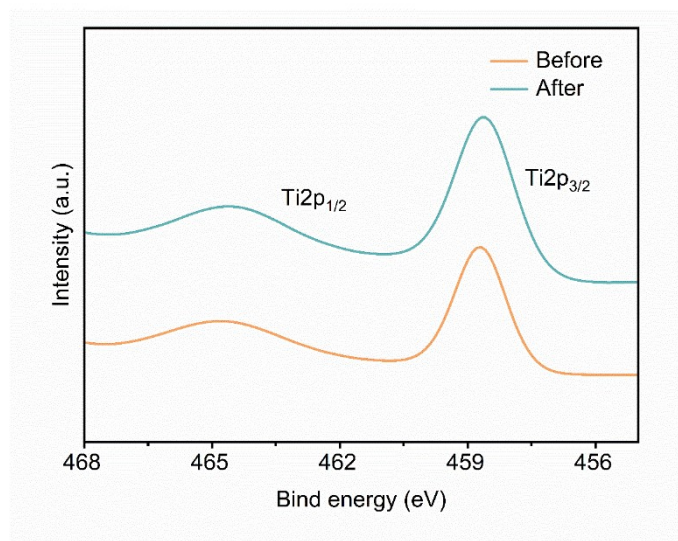

**Figure S9.** XPS (Al  $K_{\alpha}$ ) core-level spectra for Ti 2p of the before and after 8 cycles.

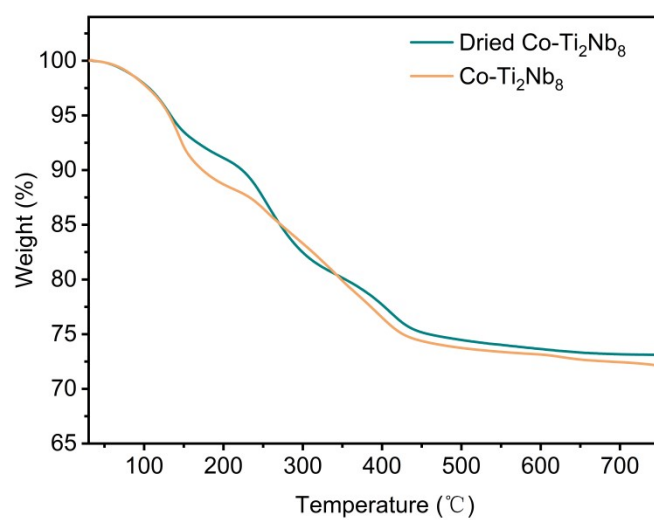

**Figure S10.** Thermogravimetric analysis of dried  $\text{Co-Ti}_2\text{Nb}_8$  and  $\text{Co-Ti}_2\text{Nb}_8$ .

Through the thermogravimetric curve of  $\text{Co-Ti}_2\text{Nb}_8$ , it is hypothesized that 11 lattice water molecules in  $\text{Co-Ti}_2\text{Nb}_8$  crystal.

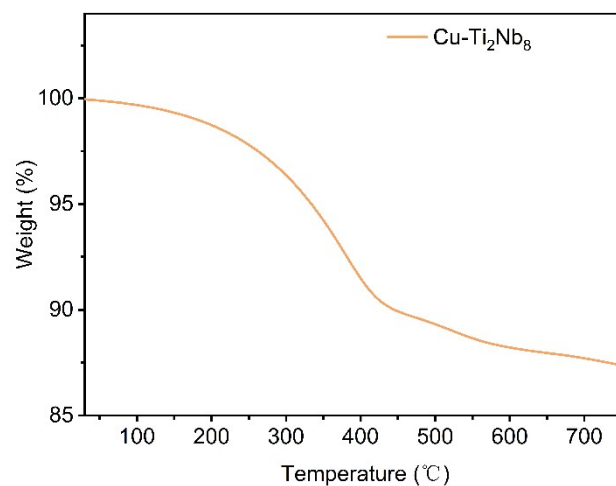

**Figure S11.** Thermogravimetric analysis of Cu-Ti<sub>2</sub>Nb<sub>8</sub>

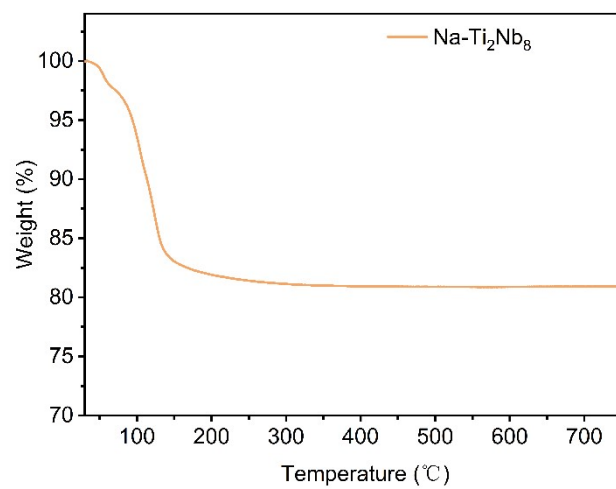

**Figure S12.** Thermogravimetric analysis of Na-Ti<sub>2</sub>Nb<sub>8</sub>.

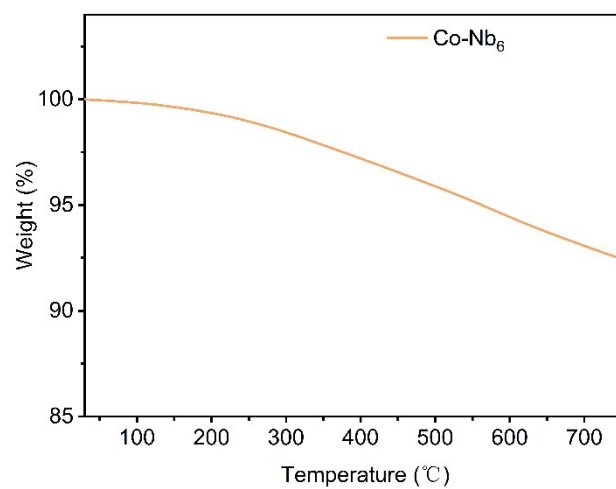

**Figure S13.** Thermogravimetric analysis of Co-Nb<sub>6</sub>.

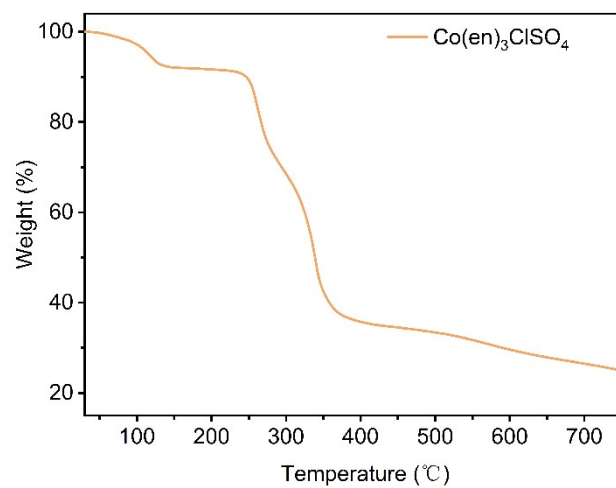

**Figure S14.** Thermogravimetric analysis of  $\text{Co(en)}_3\text{ClSO}_4$ .

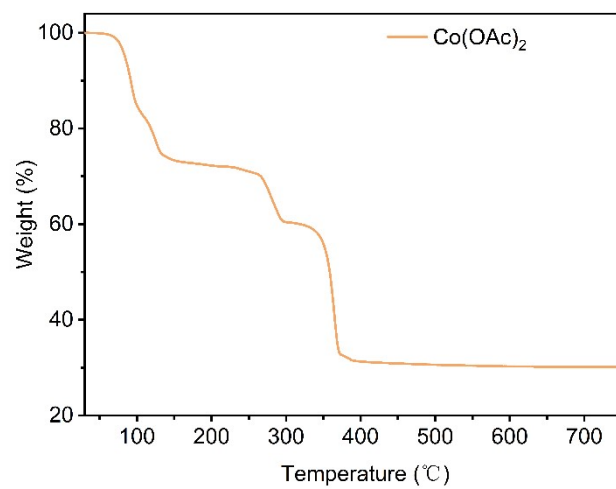

**Figure S15.** Thermogravimetric analysis of  $\text{Co(OAc)}_2$ .

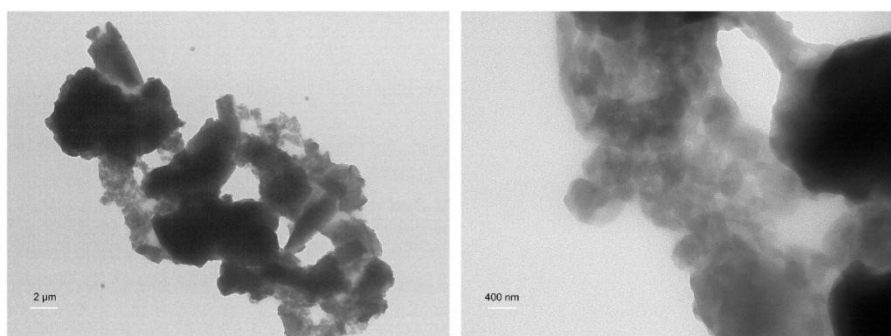

**Figure S16.** TEM images of  $\text{Co-Ti}_2\text{Nb}_8$ .

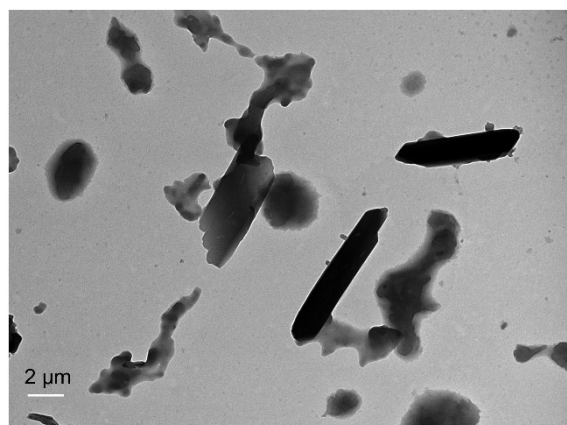

**Figure S17.** TEM images of Cu-Ti<sub>2</sub>Nb<sub>8</sub>.

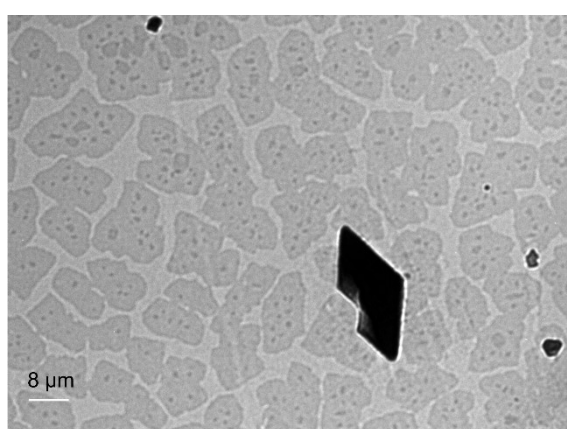

**Figure S18.** TEM images of Na-Ti<sub>2</sub>Nb<sub>8</sub>.

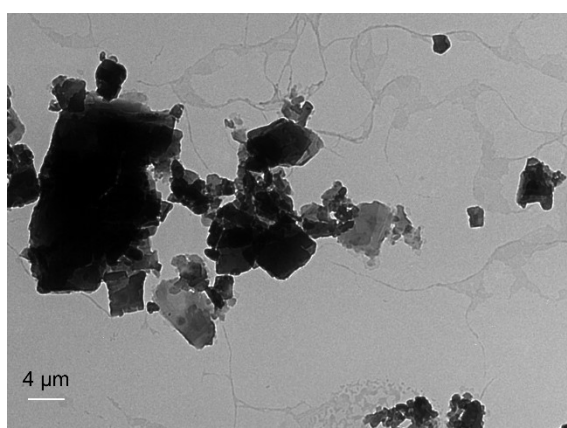

**Figure S19.** TEM images of Co-Nb<sub>6</sub>.

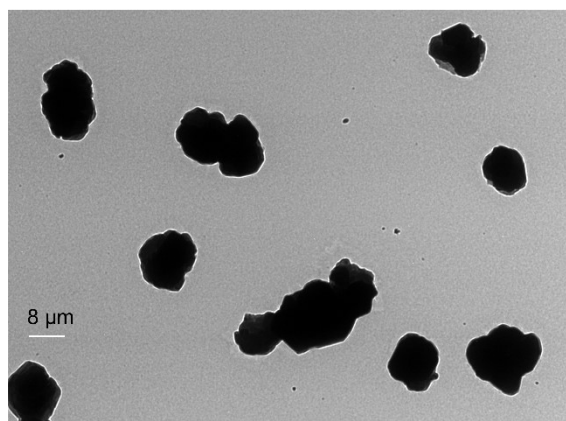

**Figure S20.** TEM images of  $\text{Co(en)}_3\text{ClSO}_4$ .

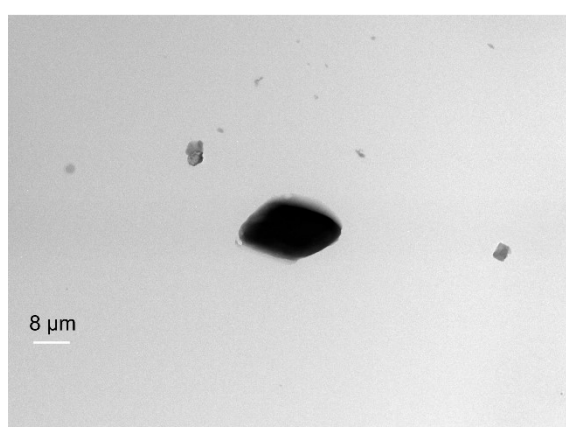

**Figure S21.** TEM images of  $\text{Co(OAc)}_2$ .

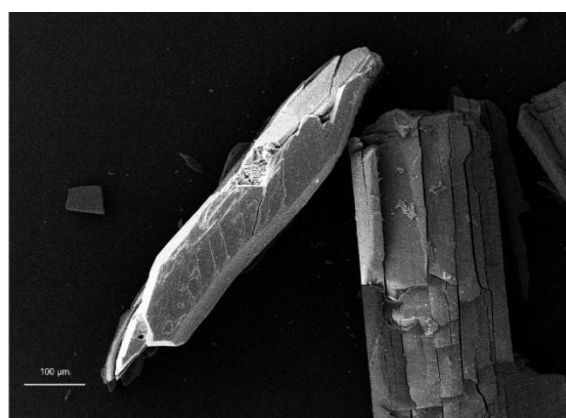

**Figure S22.** SEM images of  $\text{Co-Ti}_2\text{Nb}_8$ .

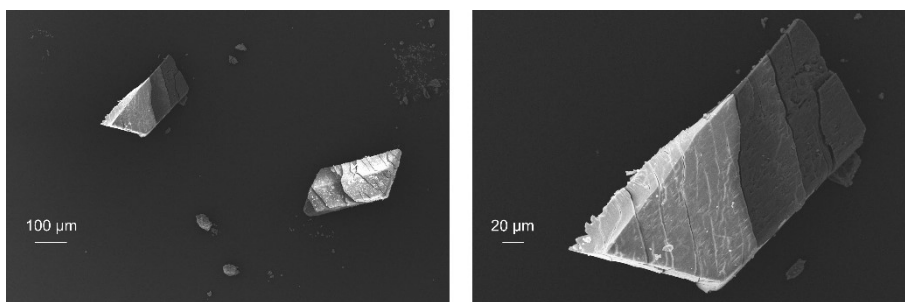

**Figure S23.** SEM images of  $\text{Cu-Ti}_2\text{Nb}_8$ .

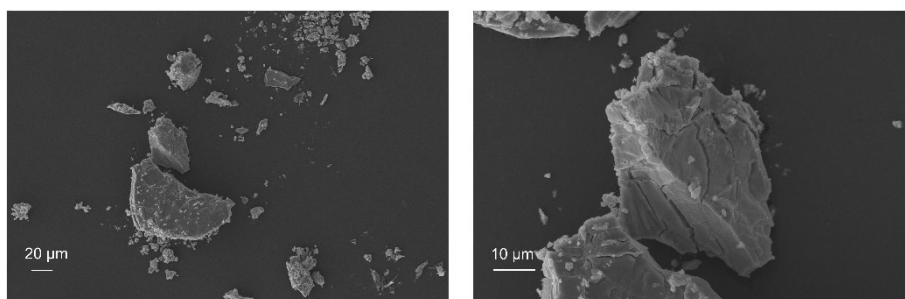

**Figure S24.** SEM images of  $\text{Na-Ti}_2\text{Nb}_8$ .

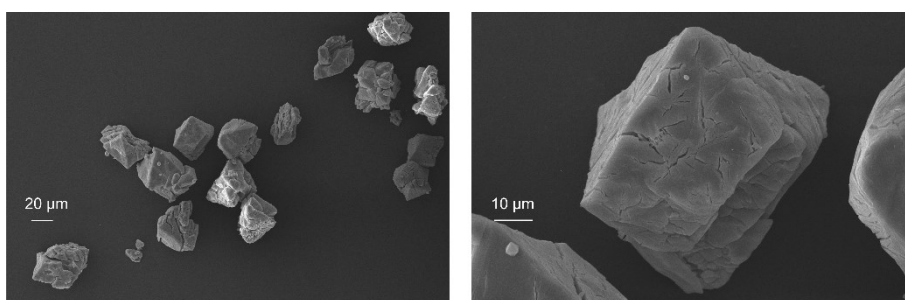

**Figure S25.** SEM images of  $\text{Co-Nb}_6$ .

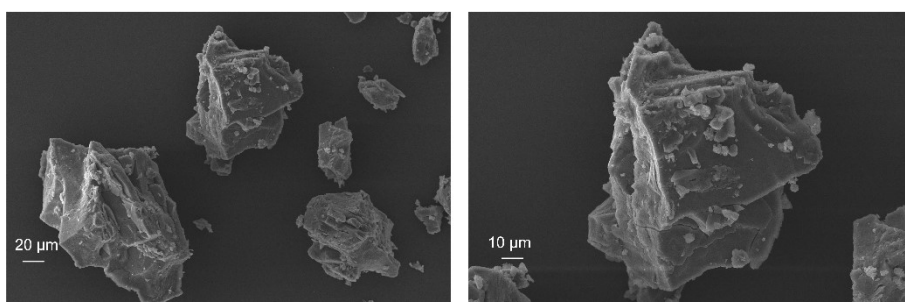

**Figure S26.** SEM images of  $\text{Co(en)}_3\text{ClSO}_4$ .



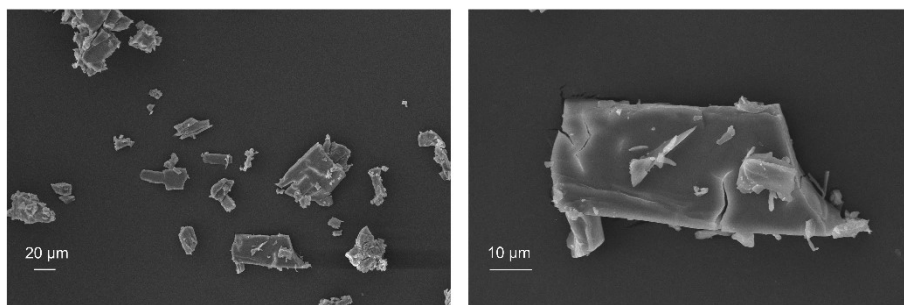

**Figure S27.** SEM images of  $\text{Co}(\text{OAc})_2$ .

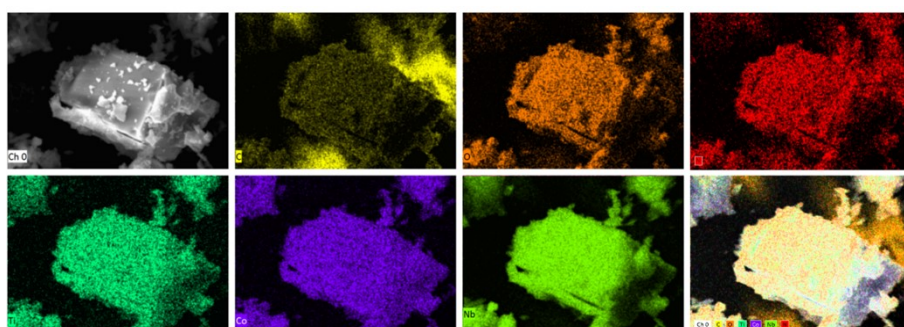

**Figure S28.** EDS elemental mapping images of C, O, N, Ti, Co and Nb of  $\text{Co-Ti}_2\text{Nb}_8$ .

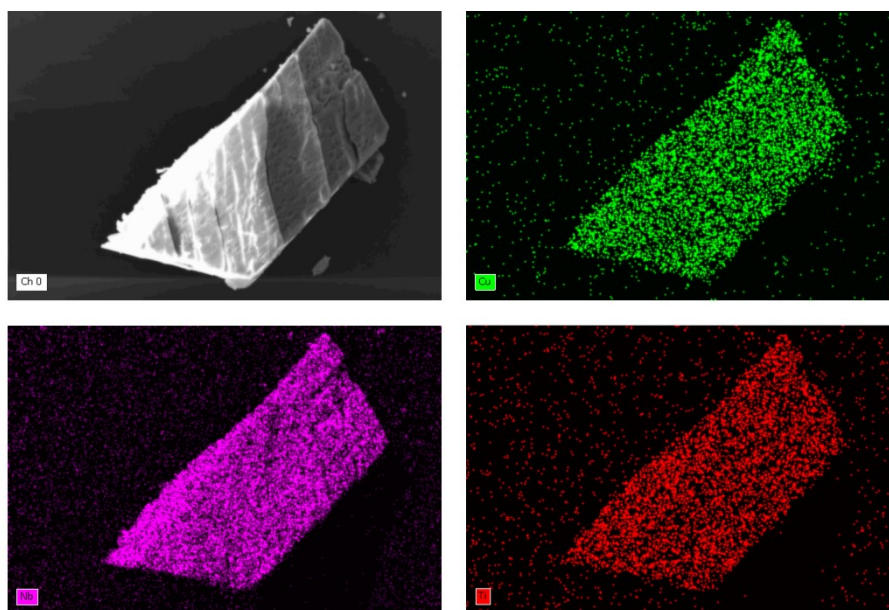

**Figure S29.** EDS elemental mapping images of Cu, Nb and Ti of  $\text{Cu-Ti}_2\text{Nb}_8$ .

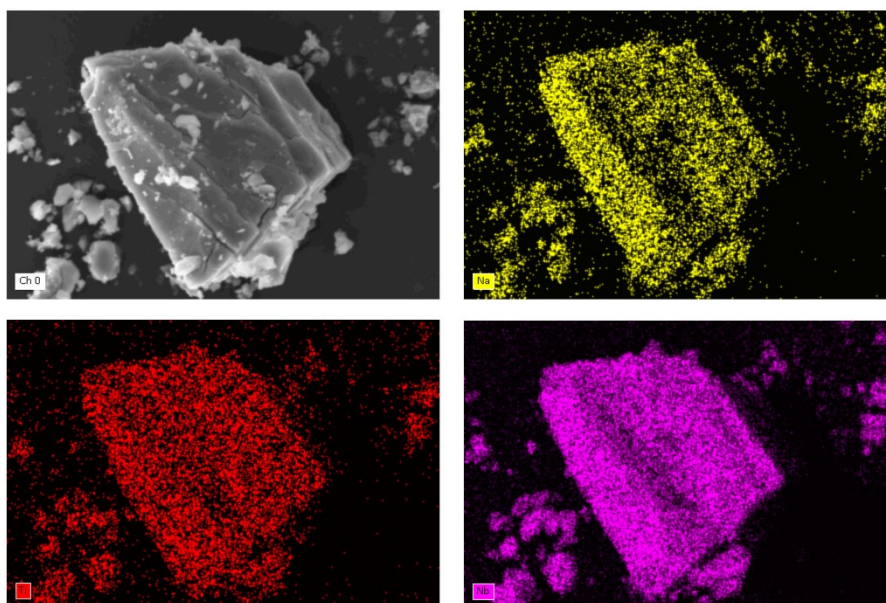

**Figure S30.** EDS elemental mapping images of Na, Nb and Ti of Na-Ti<sub>2</sub>Nb<sub>8</sub>.

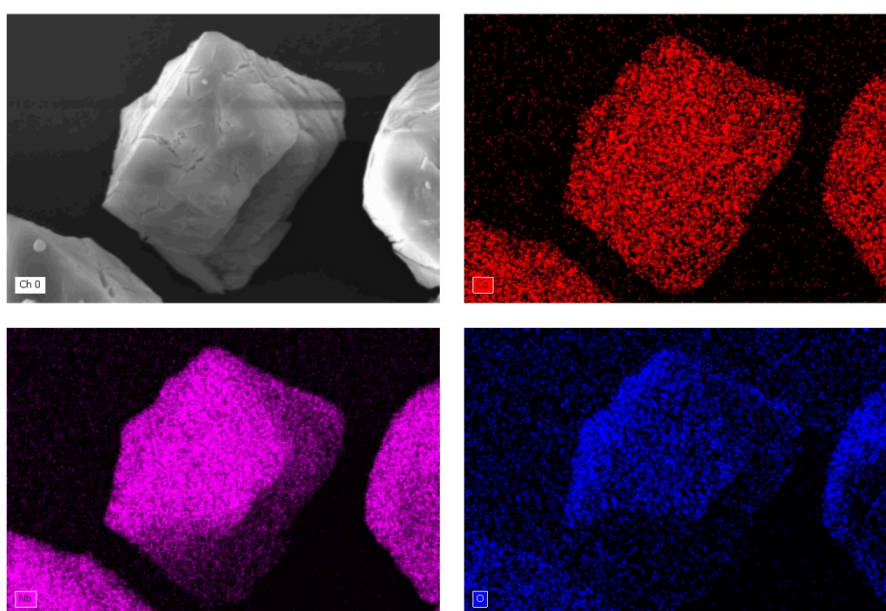

**Figure S31.** EDS elemental mapping images of Co, Nb and O of Co-Nb<sub>6</sub>.



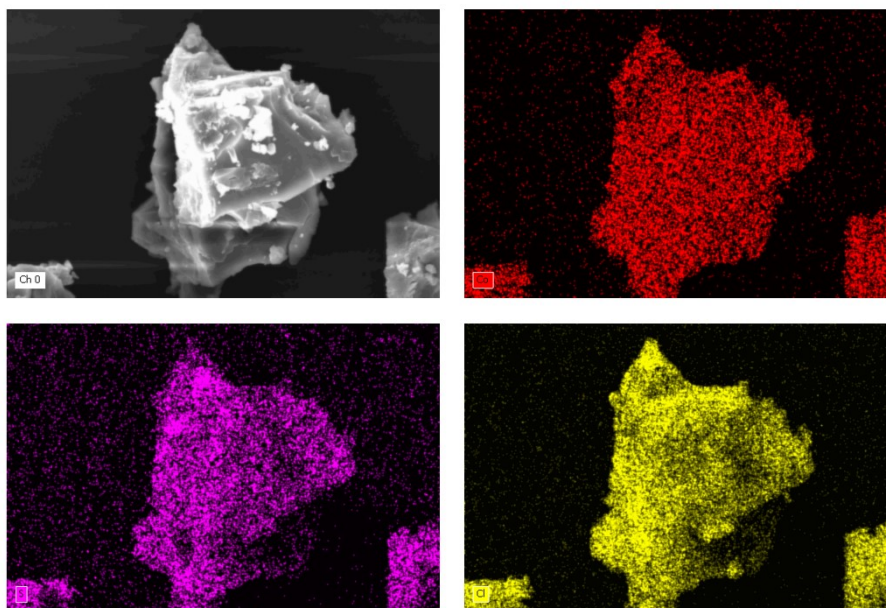

**Figure S32.** EDS elemental mapping images of Co, S and Cl of  $\text{Co(en)}_3\text{ClSO}_4$ .

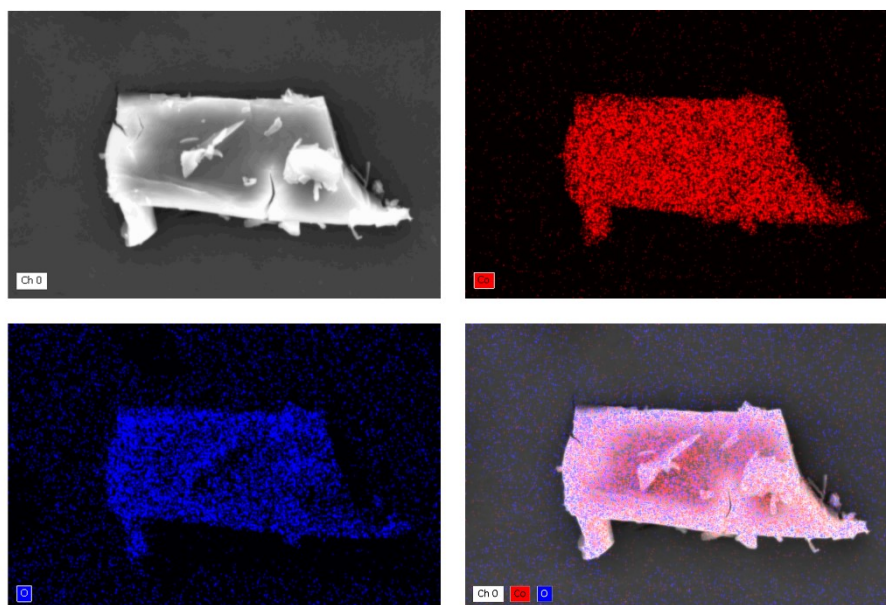

**Figure S33.** EDS elemental mapping images of Co and O of  $\text{Co(OAc)}_2$ .

**Table S8.** BET surface area of catalysts

| Catalysts                             | BET surface area (m <sup>2</sup> /g) |
|---------------------------------------|--------------------------------------|
| Co-Ti <sub>2</sub> Nb <sub>8</sub>    | 2.96                                 |
| Cu-Ti <sub>2</sub> Nb <sub>8</sub>    | 5.22                                 |
| Na-Ti <sub>2</sub> Nb <sub>8</sub>    | 2.72                                 |
| Co-Nb <sub>6</sub>                    | 5.07                                 |
| Co(en) <sub>3</sub> ClSO <sub>4</sub> | 2.41                                 |
| Co(OAc) <sub>2</sub>                  | 5.25                                 |

Note: measured at 77K.

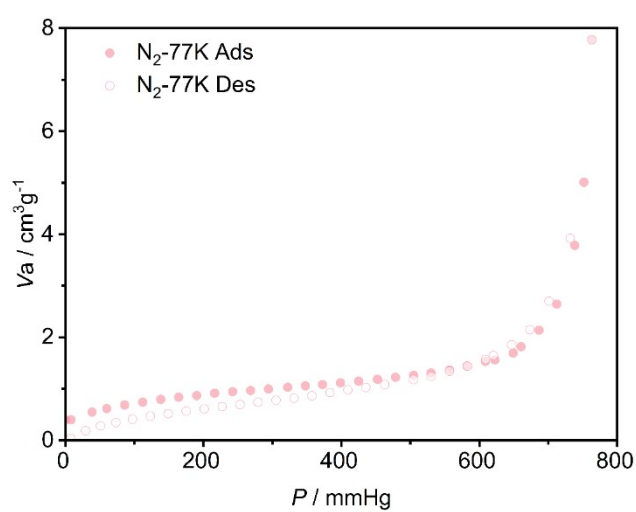**Figure S34.** The nitrogen adsorption curve of Co-Ti<sub>2</sub>Nb<sub>8</sub> was measured at 77K.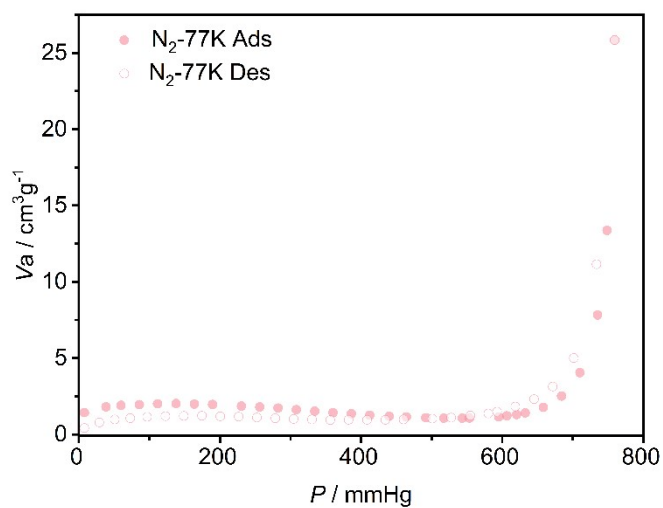**Figure S35.** The nitrogen adsorption curve of Cu-Ti<sub>2</sub>Nb<sub>8</sub> was measured at 77K.

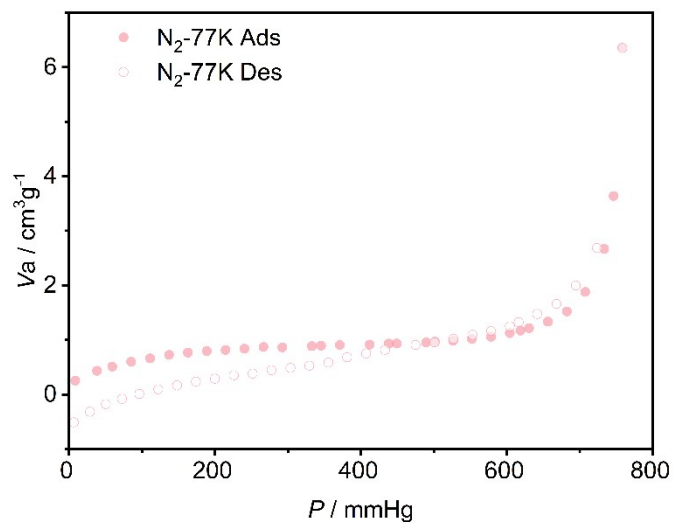

**Figure S36.** The nitrogen adsorption curve of Na-Ti<sub>2</sub>Nb<sub>8</sub> was measured at 77K.

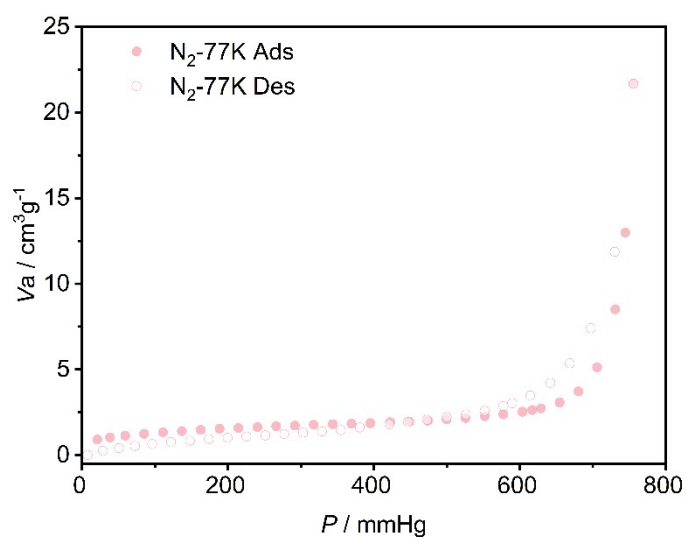

**Figure S37.** The nitrogen adsorption curve of Co-Nb<sub>6</sub> was measured at 77K.

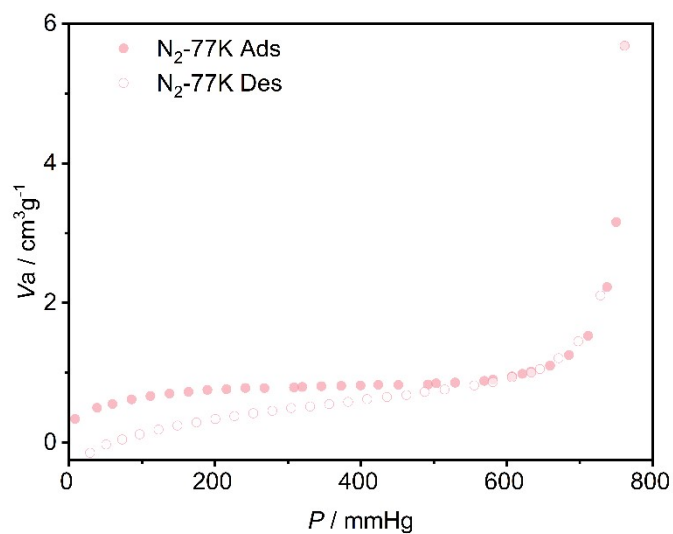

**Figure S38.** The nitrogen adsorption curve of Co(en)<sub>3</sub>ClSO<sub>4</sub> was measured at 77K.

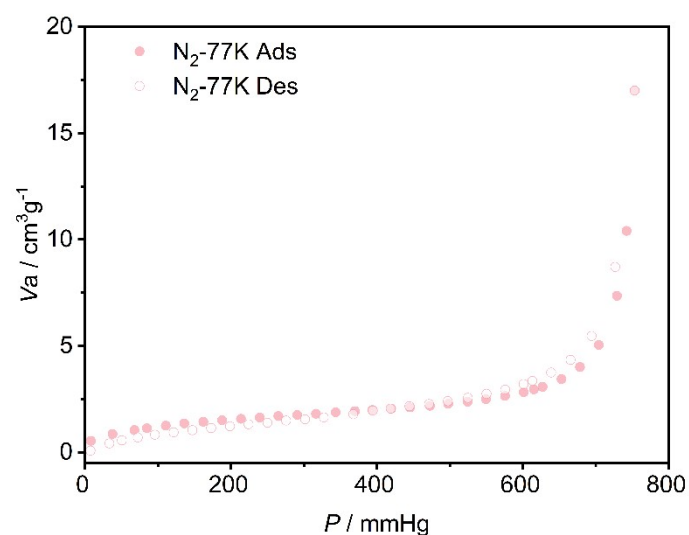

**Figure S39.** The nitrogen adsorption curve of  $\text{Co}(\text{OAc})_2$  was measured at 77K.

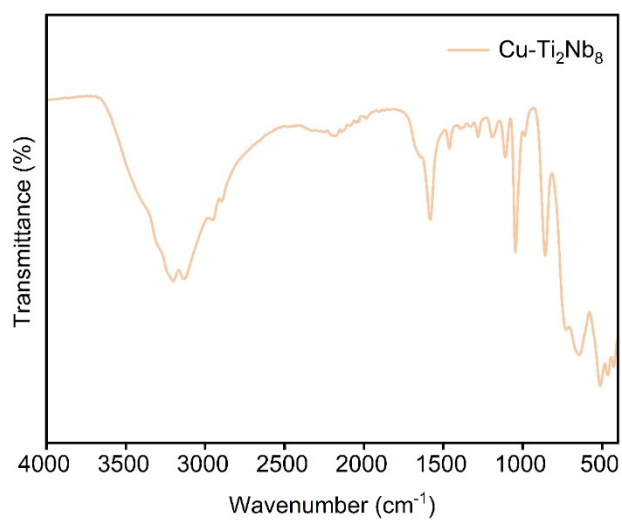

**Figure S40.** IR spectrum of  $\text{Cu-Ti}_2\text{Nb}_8$ .

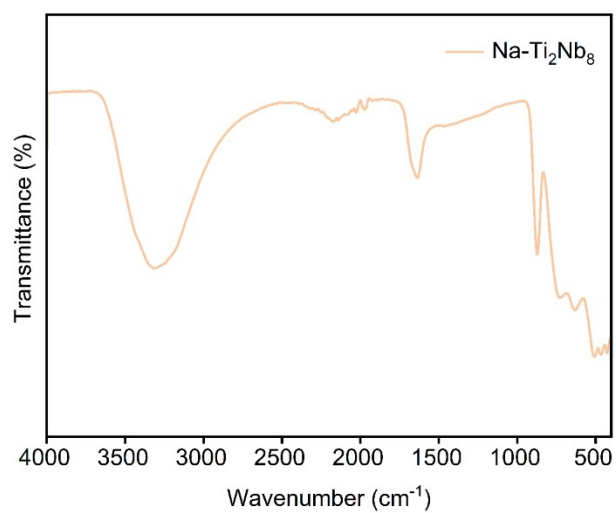

**Figure S41.** IR spectrum of  $\text{Na-Ti}_2\text{Nb}_8$ .

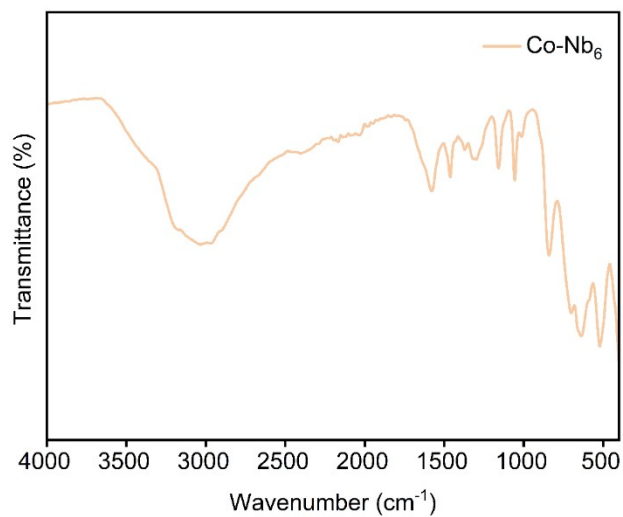

**Figure S42.** IR spectrum of  $\text{Co-Nb}_6$ .

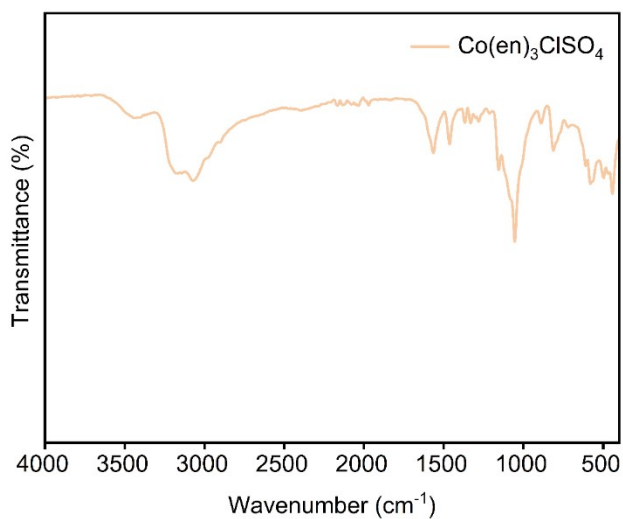

**Figure S43.** IR spectrum of  $\text{Co(en)}_3\text{ClSO}_4$ .

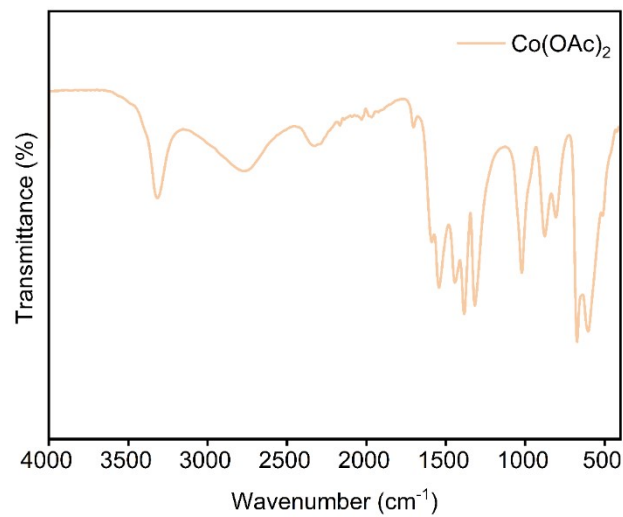

**Figure S44.** IR spectrum of  $\text{Co}(\text{OAc})_2$ .

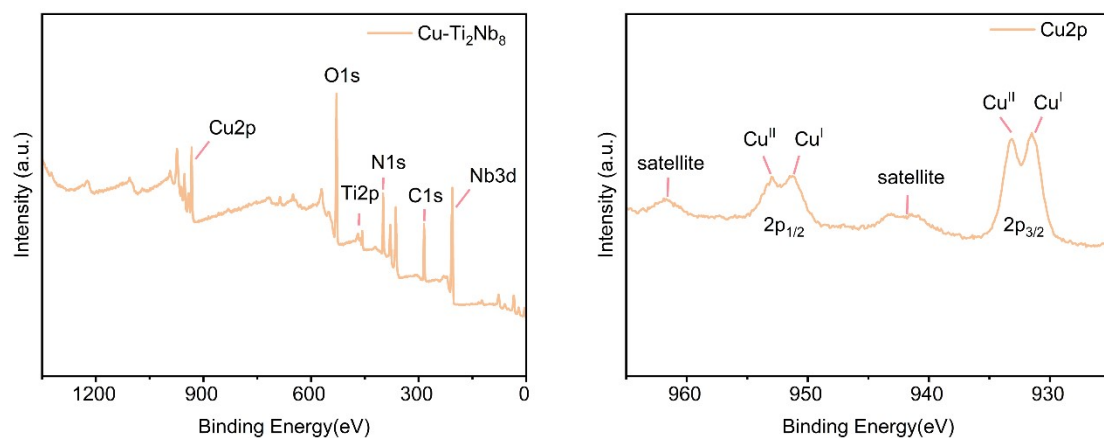

**Figure S45.** The XPS spectra of  $\text{Cu-Ti}_2\text{Nb}_8$ .

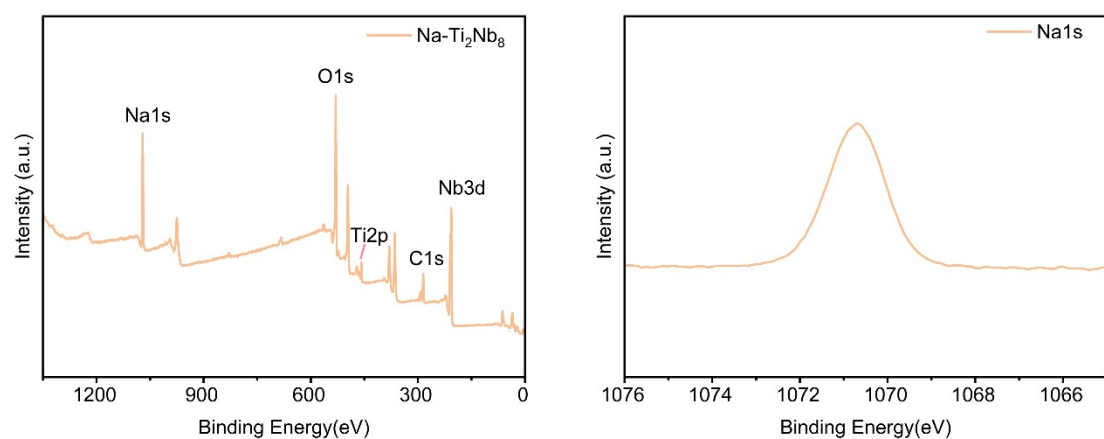

**Figure S46.** The XPS spectra of  $\text{Na-Ti}_2\text{Nb}_8$ .

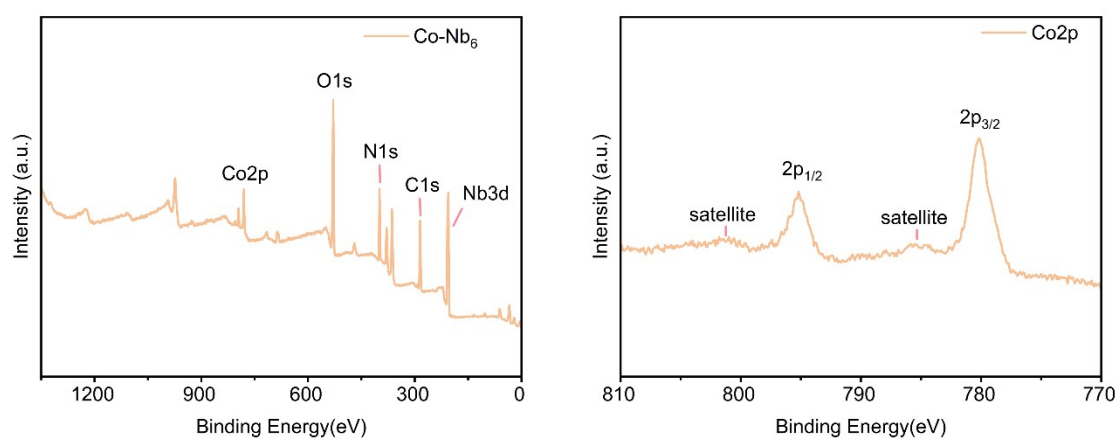

**Figure S47.** The XPS spectra of  $\text{Co-Nb}_6$ .



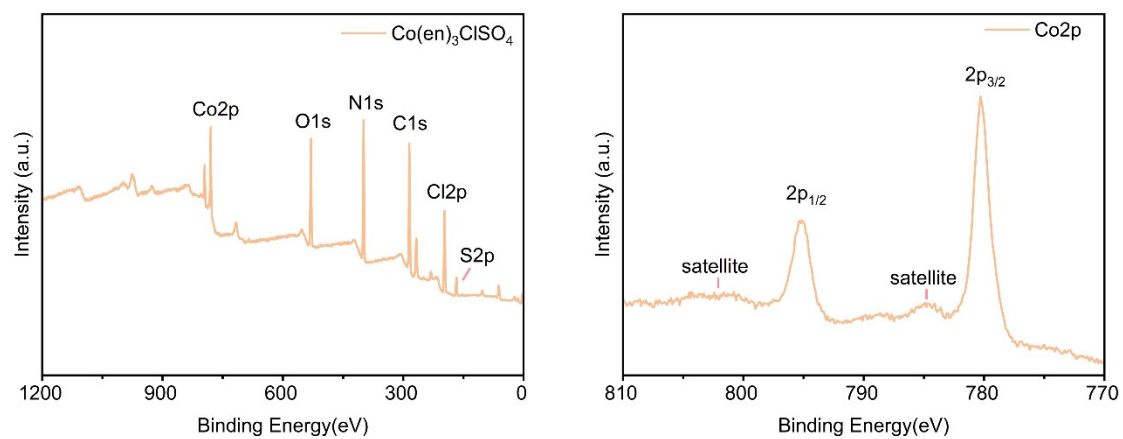

**Figure S48.** The XPS spectra of  $\text{Co(en)}_3\text{ClSO}_4$ .

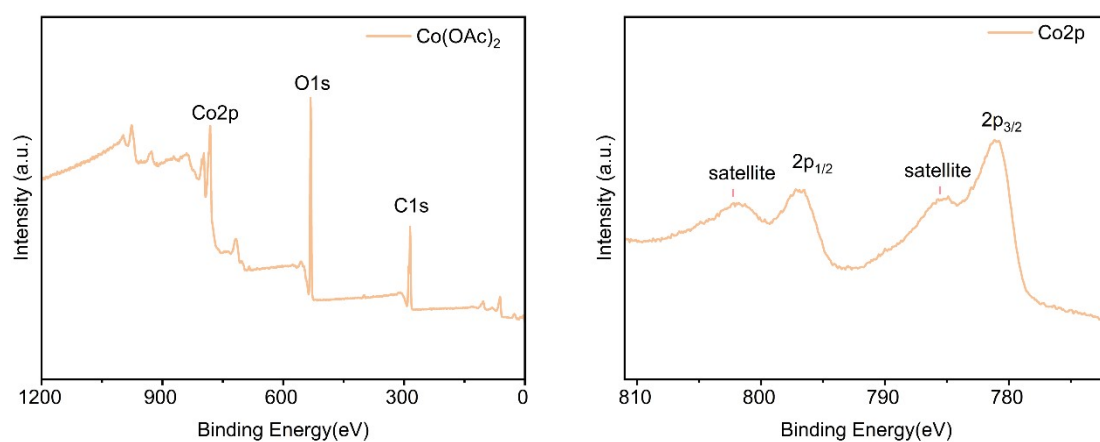

**Figure S49.** The XPS spectra of  $\text{Co(OAc)}_2$ .

## 8. Calculation Section

First-principles DFT simulations were performed using the VASP package. The electron exchange-correlation (XC) energies were treated by the generalized gradient approximation (GGA) in the Perdew Burke Ernzerhof (PBE) scheme.<sup>5</sup> In addition, the projection enhanced wave (PAW) pseudopotential was used to describe the ion nucleus and valence electron interactions.<sup>6</sup> A kinetic energy cutoff of 400 eV was chosen as the plane wave basis set. To focus solely on the interactions between the oxygen molecules and the active sites, we simplified the calculations and reduced the computational load by extracting the Co-Ti<sub>2</sub>Nb<sub>8</sub> dimer as the computational model. Under the premise of immobilizing the niobium-oxo cluster components, the adsorption of oxygen and its interaction with the cobalt complex active center were optimized, with the forces fell below 0.01 eV Å<sup>-1</sup>. The integration over the reciprocal space was performed using a Monkhorst model with a  $\Gamma$ -point. The atomistic structures and the difference charge densities are illustrated using VESTA.<sup>7</sup> The version of the Bader program used for Bader charge analysis is v1.05.<sup>8</sup>

## 9. References

1. C. X. Chen, S. L. Duan, X. Y. Zhang, R. Z. Sun, P. W. Cai, C. Sun and S. T. Zheng, *Dalton Trans.* **2025**, DOI: 10.1039/D4DT03071K.
2. Y. T. Zhang, P. Huang, C. Qin, L. K. Yan, B. Q. Song, Z. X. Yang, K. Z. Shao and Z. M. Su, *Dalton Trans.* **2014**, *43*, 9847–9850.
3. M. Nyman, L. J. Criscenti, F. Bonhomme, M. A. Rodriguez, R. T. Cygan, *J. Solid State Chem.* **2003**, *176*, 111–119.
4. D. Jacewicz, J. Pranczk, D. Wyrzykowski, K. Żamojć, L. Chmurzyński, *React. Kinet. Mech. Catal.* **2014**, *113*, 321–331.
5. J. P. Perdew, K. Burke, M. Ernzerhof, *Phys. Rev. Lett.* **1996**, *77*, 3865–3868.
6. a) P. E. Blochl. *Phys. Rev. B* **1994**, *50*, 17953–17979; b) G. Kresse, D. Joubert, *Phys. Rev. B* **1999**, *59*, 1758–1775.
7. K. Momma, F. Izumi, *J. Appl. Crystallogr.* **2011**, *44*, 1272–1276.
8. W. Tang, E. Sanville, G. Henkelman, *J. Phys.: Condens. Matter* **2009**, *21*, 084204.

## 10. $^1\text{H}$ and $^{13}\text{C}$ NMR Spectra

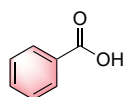

2a- $^1\text{H}$  NMR-DMSO-d<sub>6</sub>

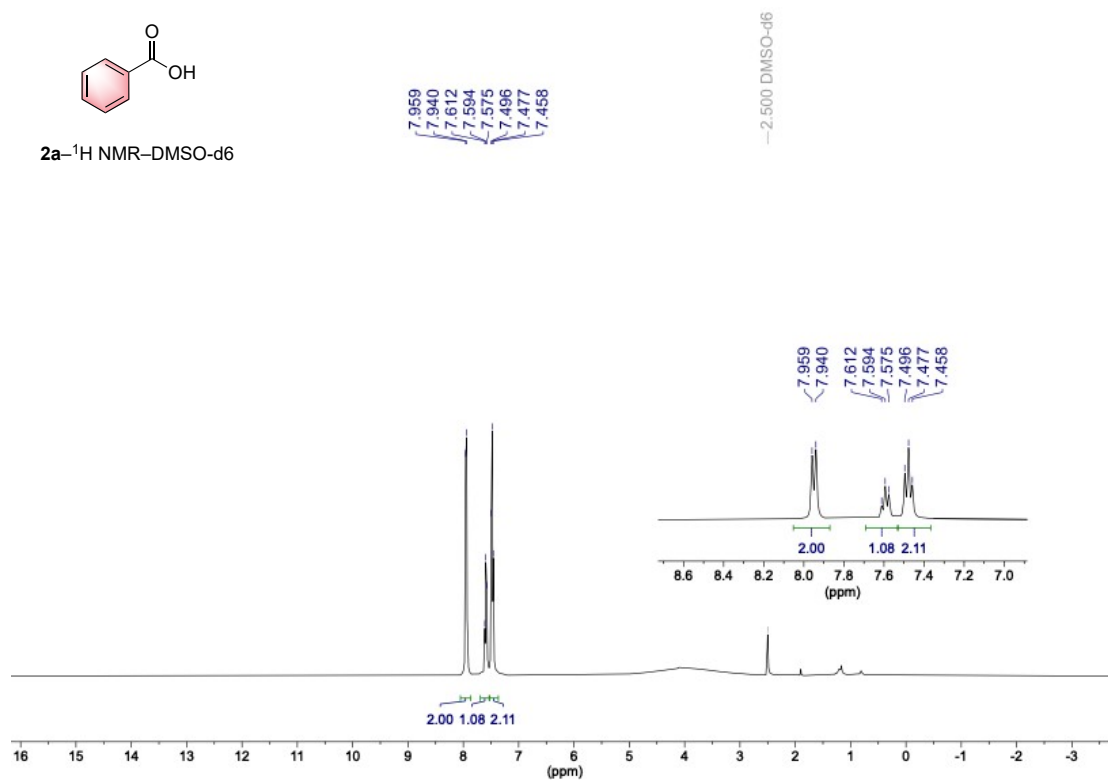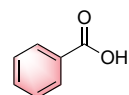

2a- $^{13}\text{C}$  NMR-DMSO-d<sub>6</sub>

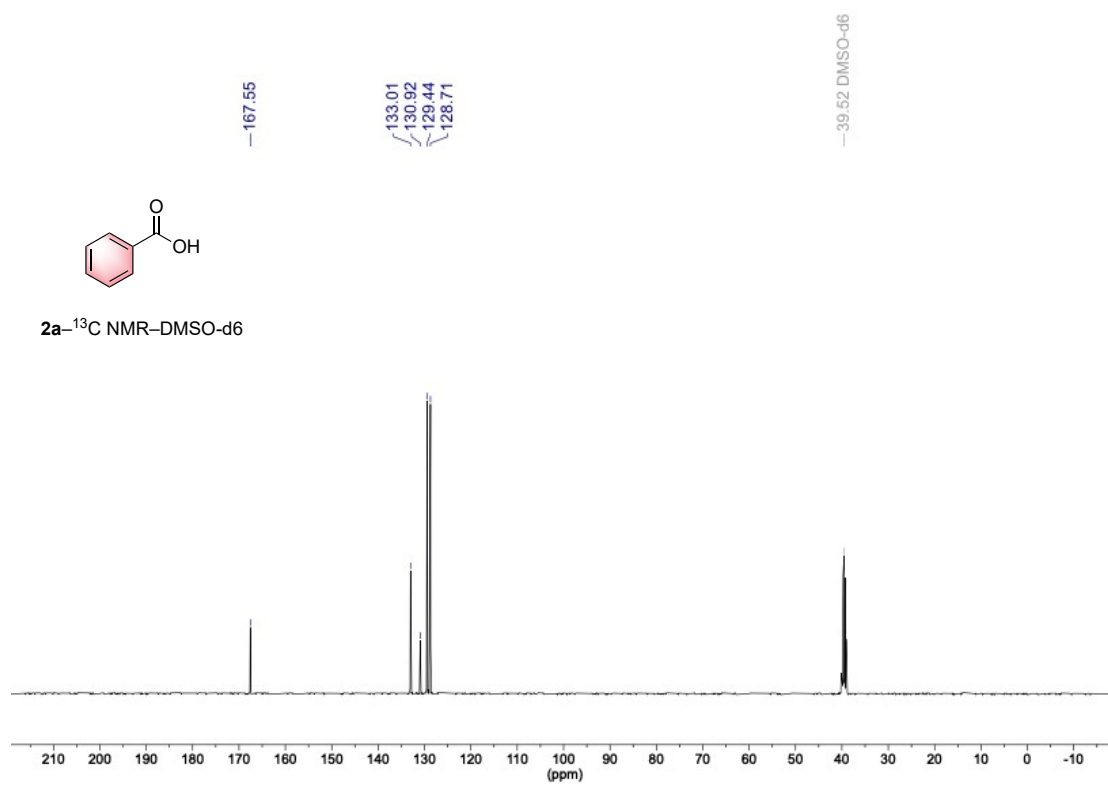

single\_pulse

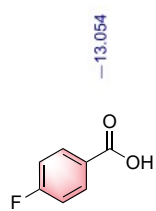

**2b**- $^1\text{H}$  NMR-DMSO-d<sub>6</sub>

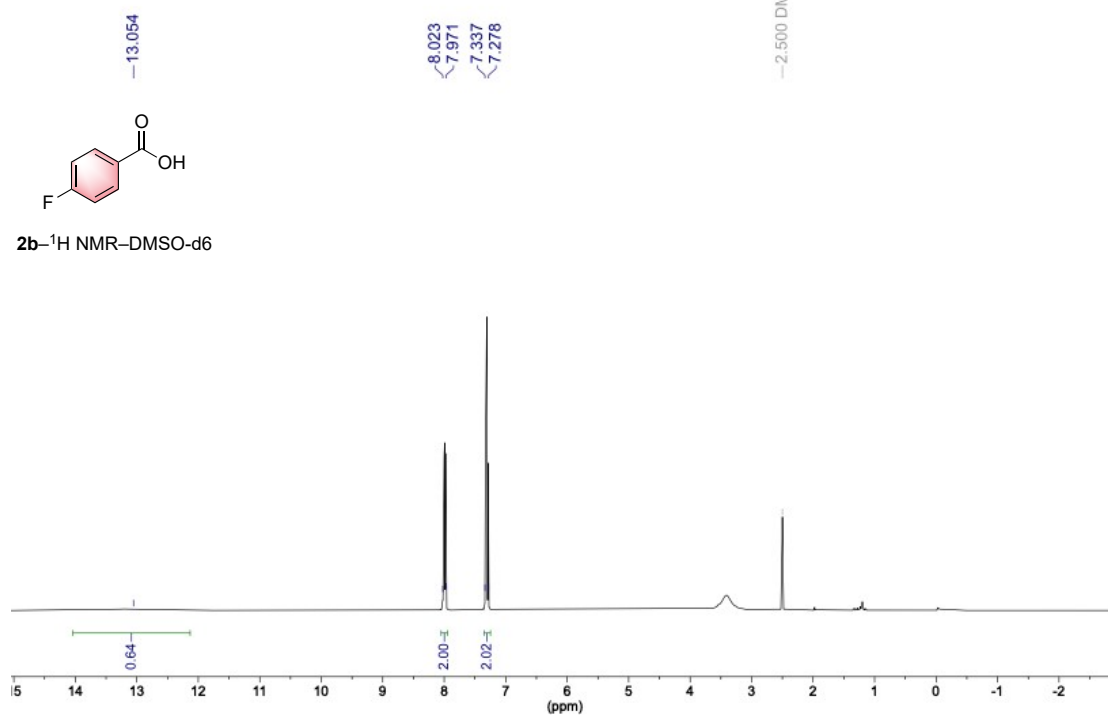

single pulse decoupled gated NOE

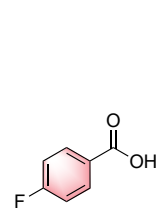

**2b**- $^{13}\text{C}$  NMR-DMSO-d<sub>6</sub>

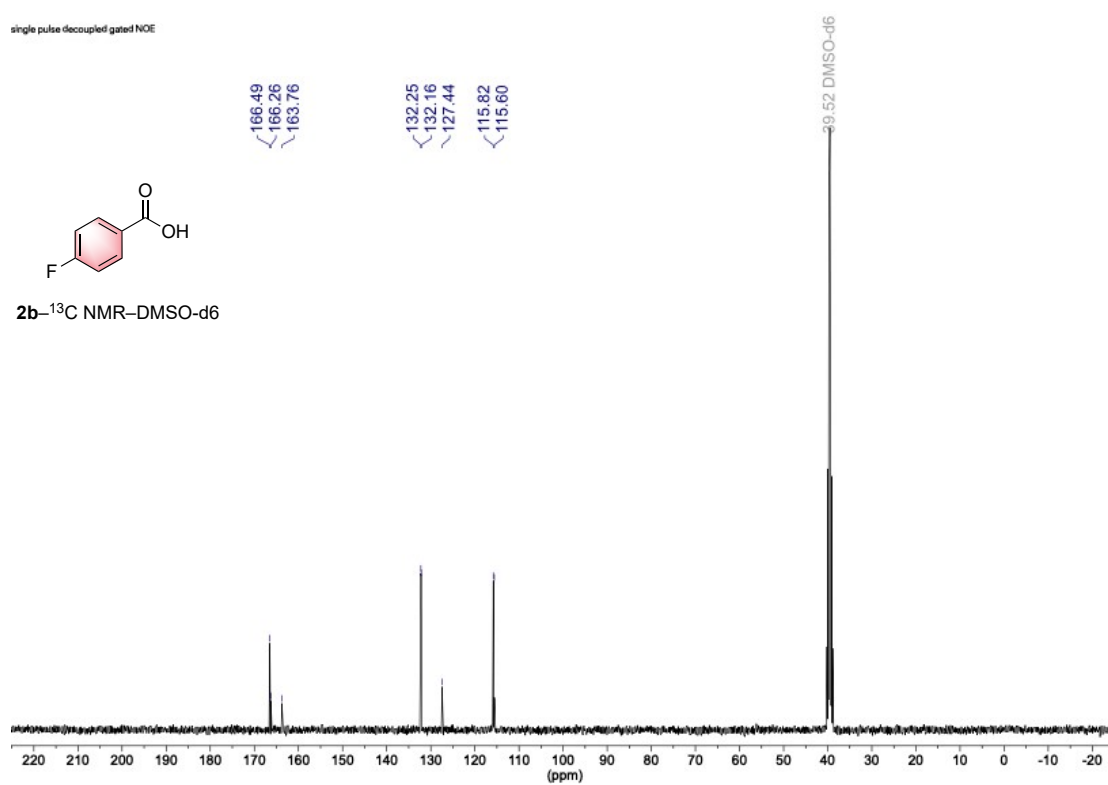

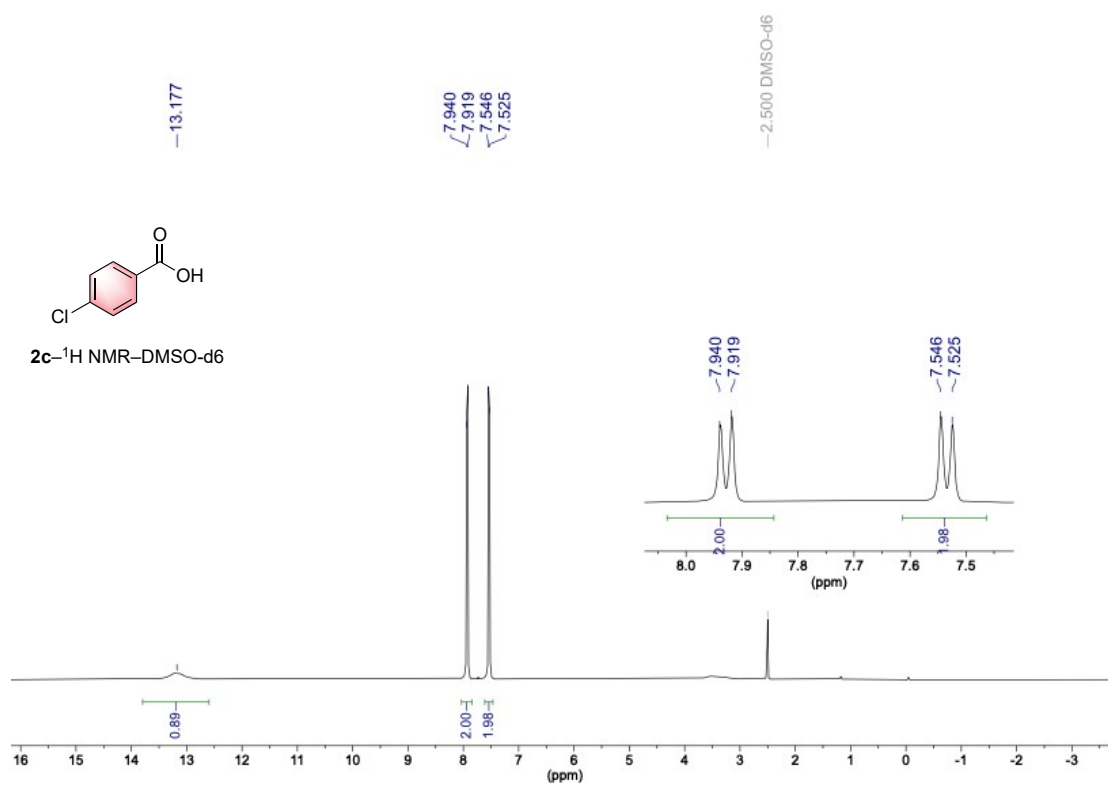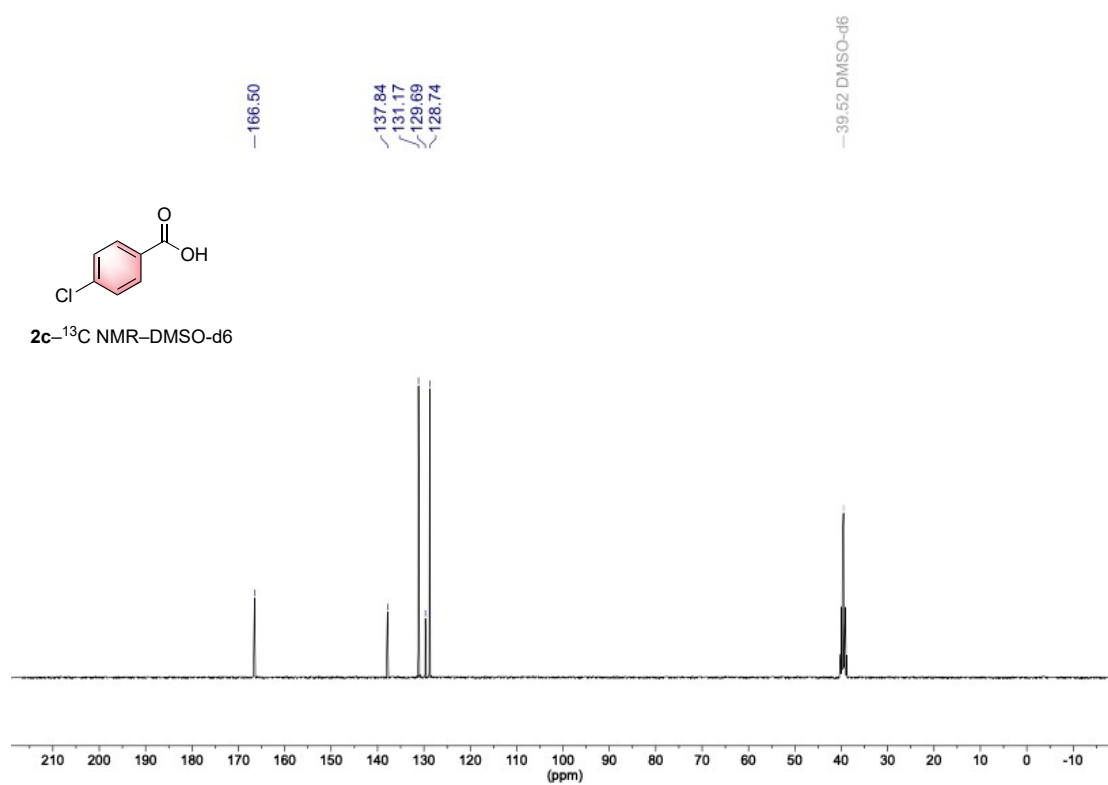

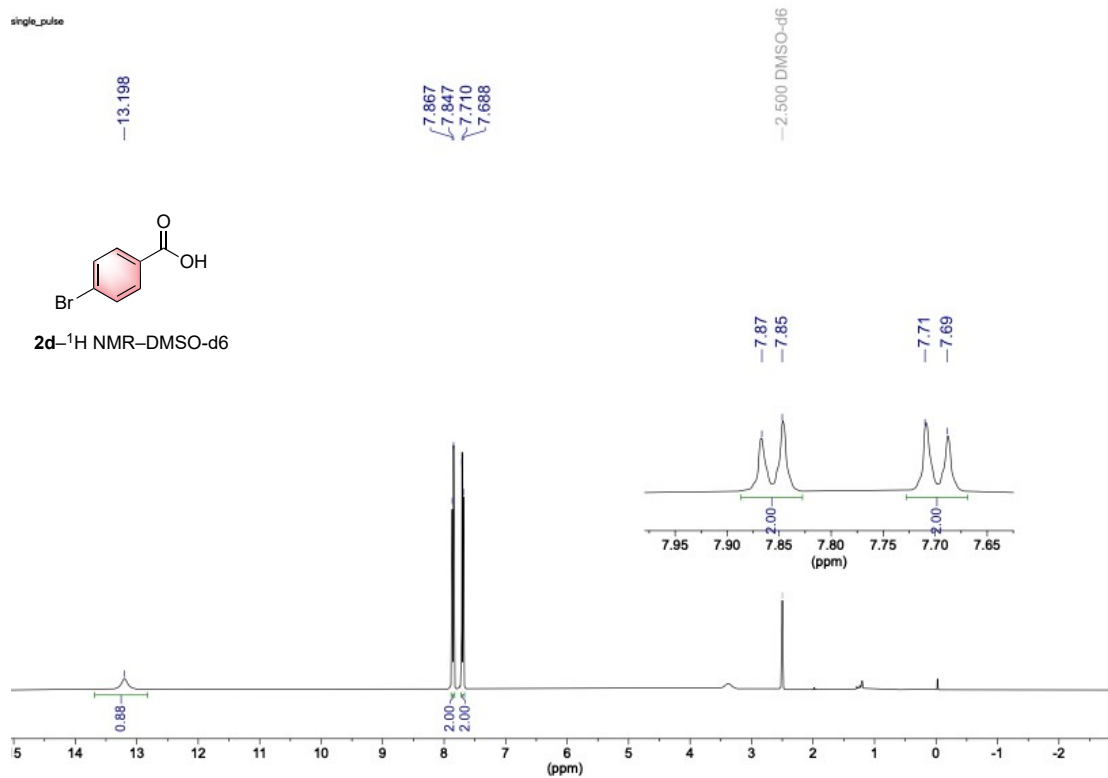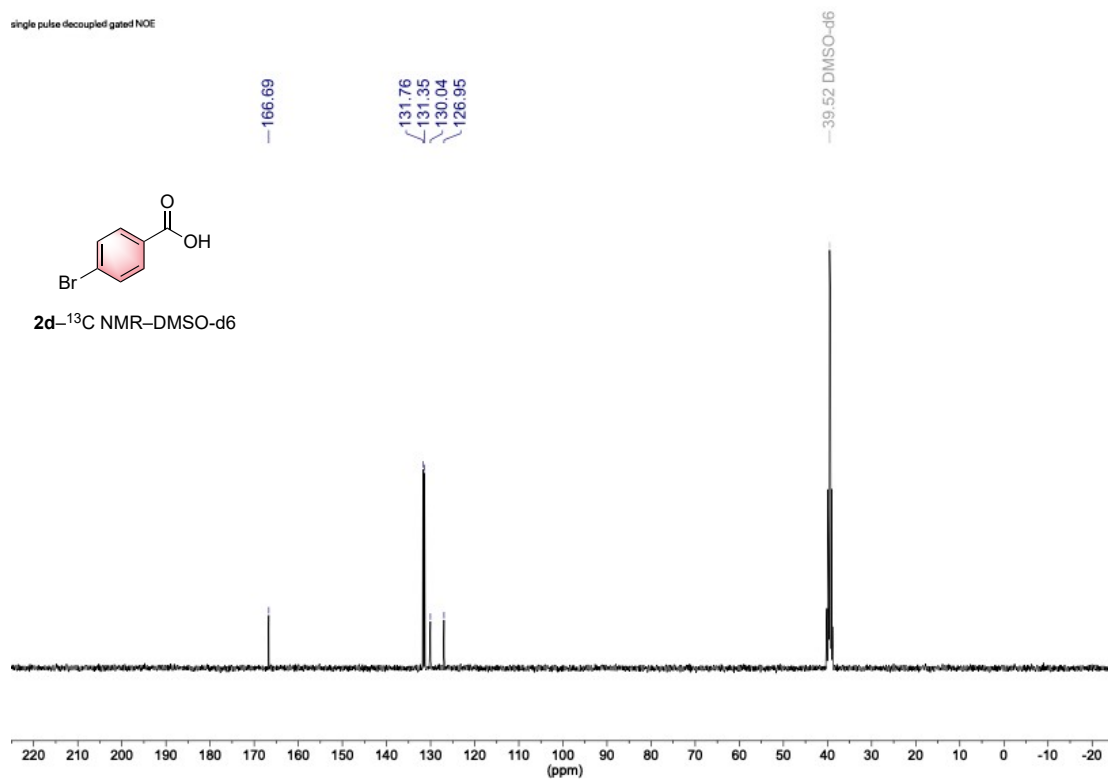

single\_pulse

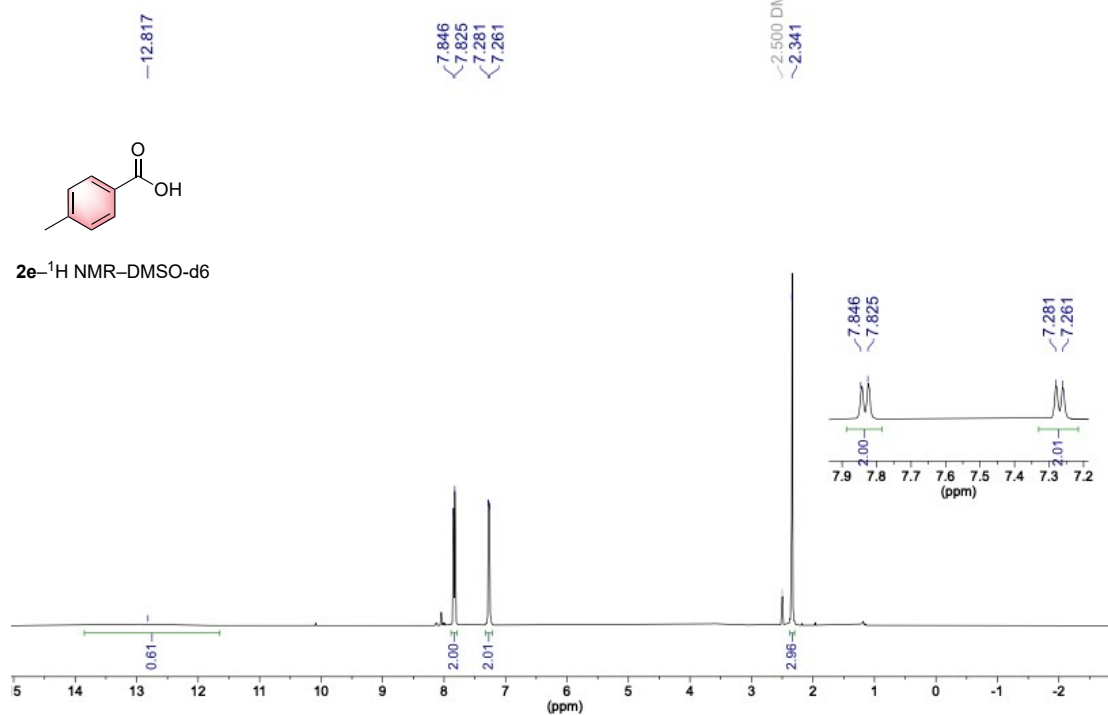

single pulse decoupled gated NOE

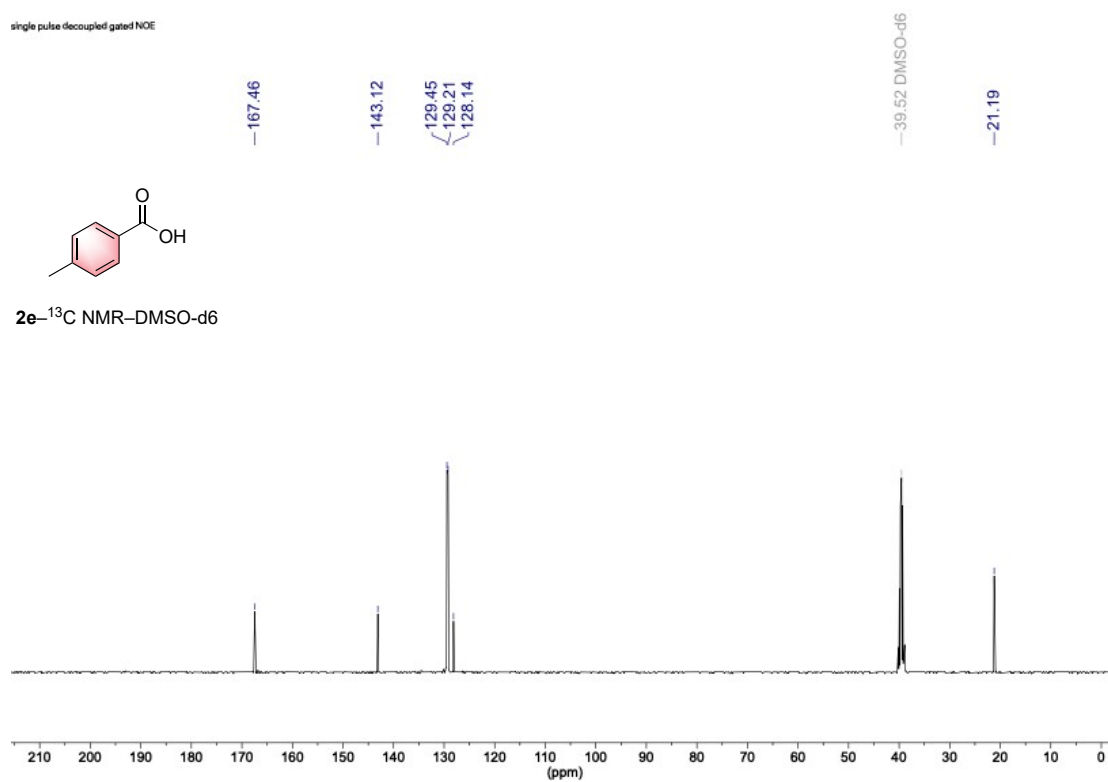



single\_pulse

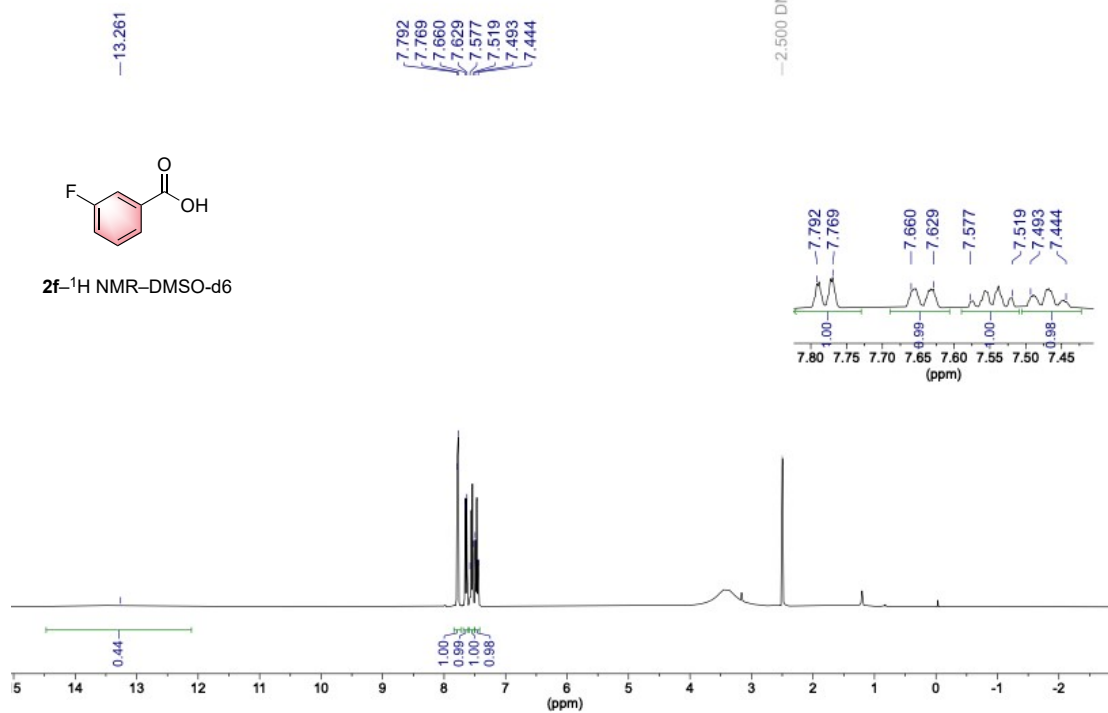

single pulse decoupled gated NOE

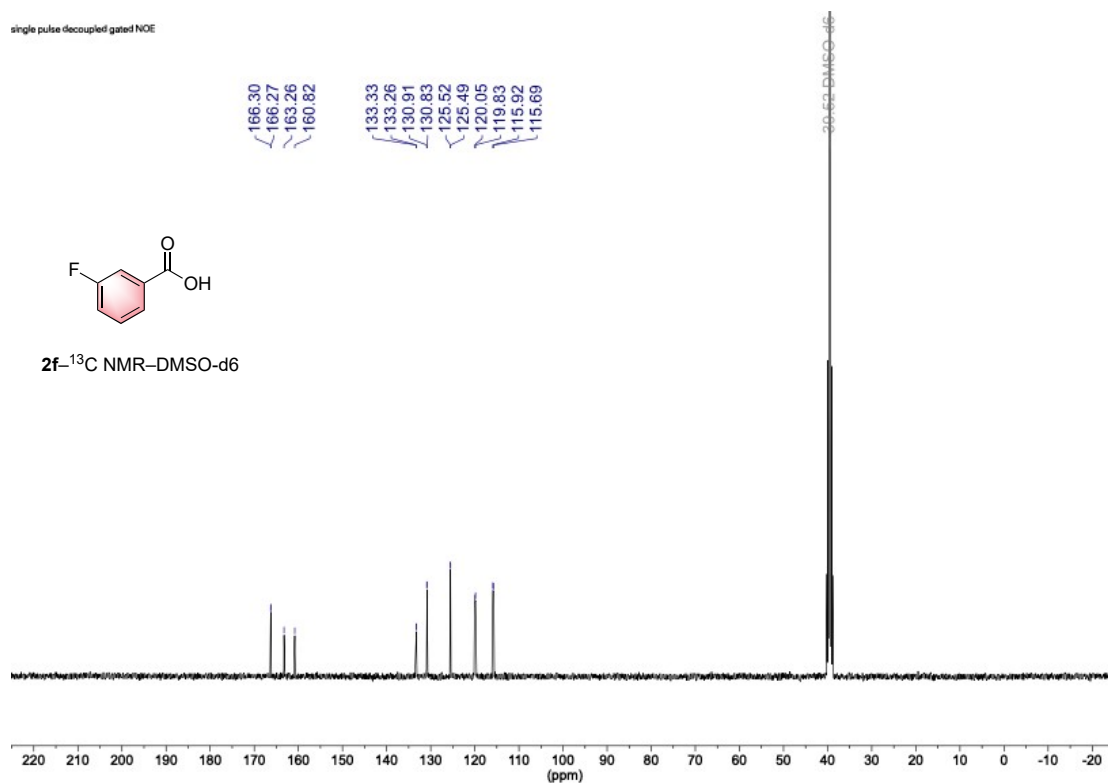

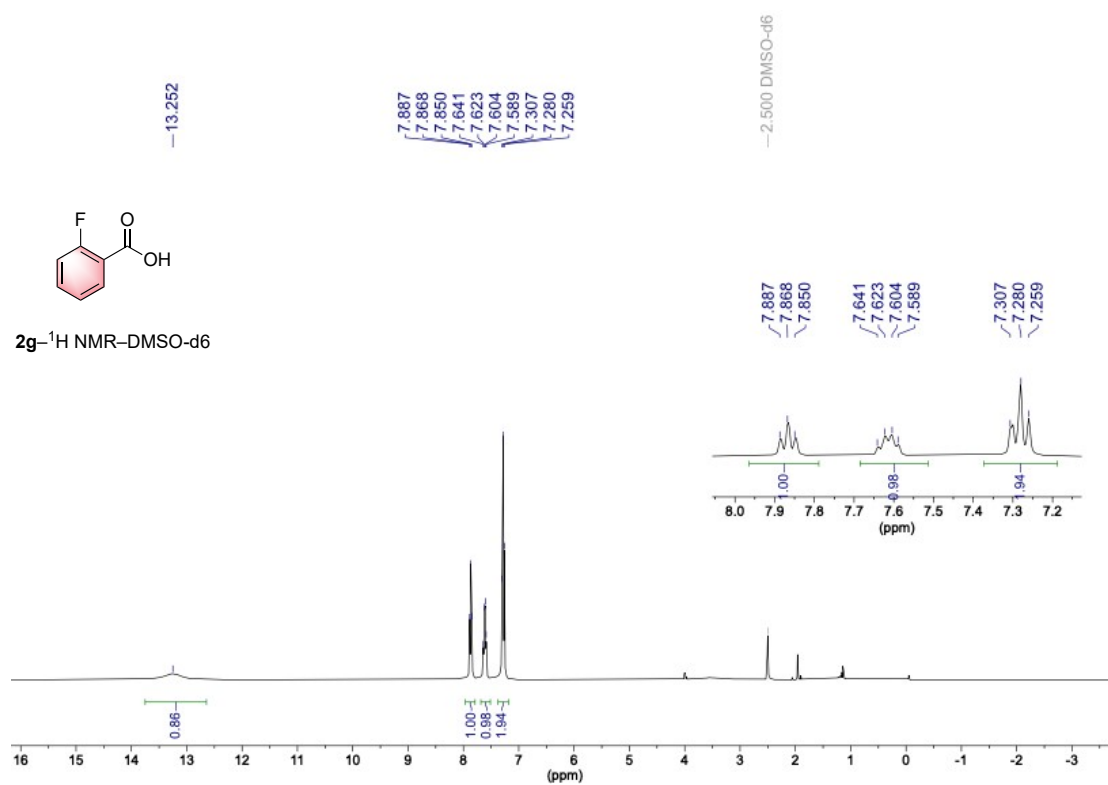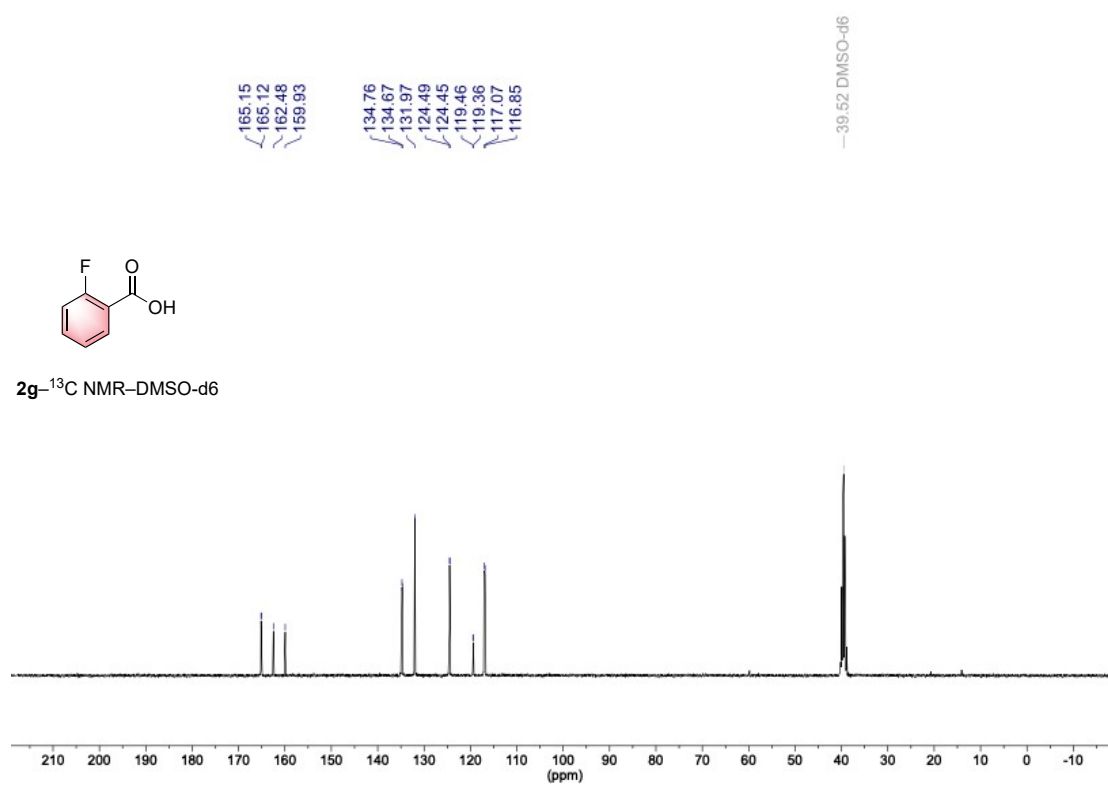

single\_pulse

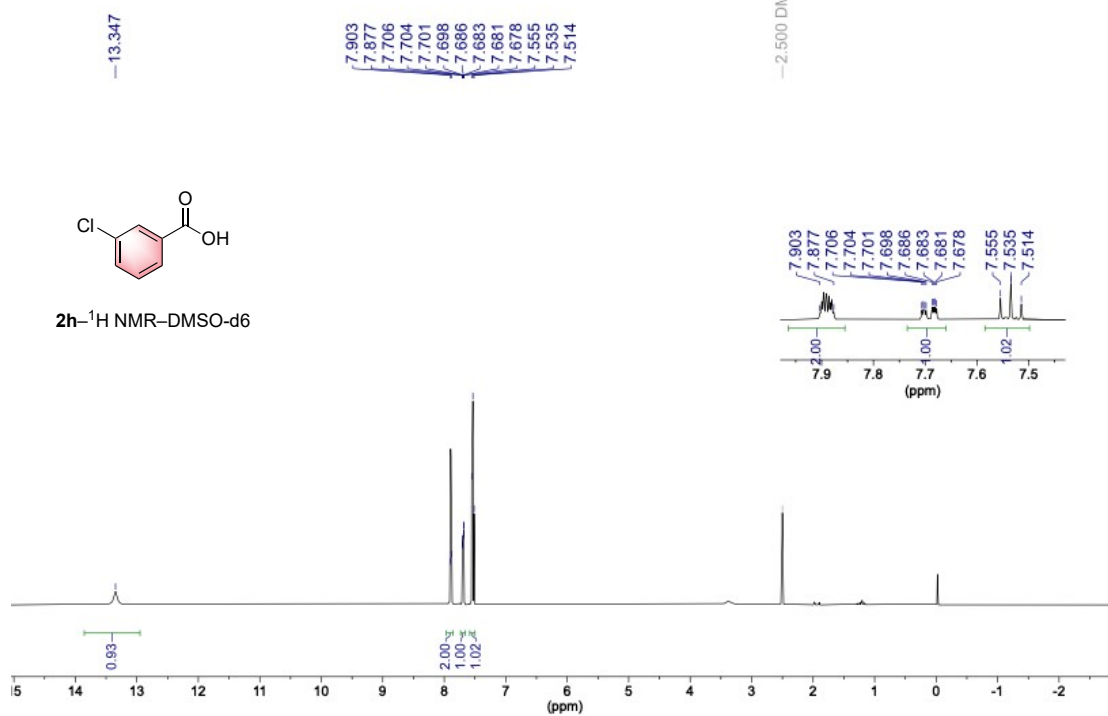

single pulse decoupled gated NOE

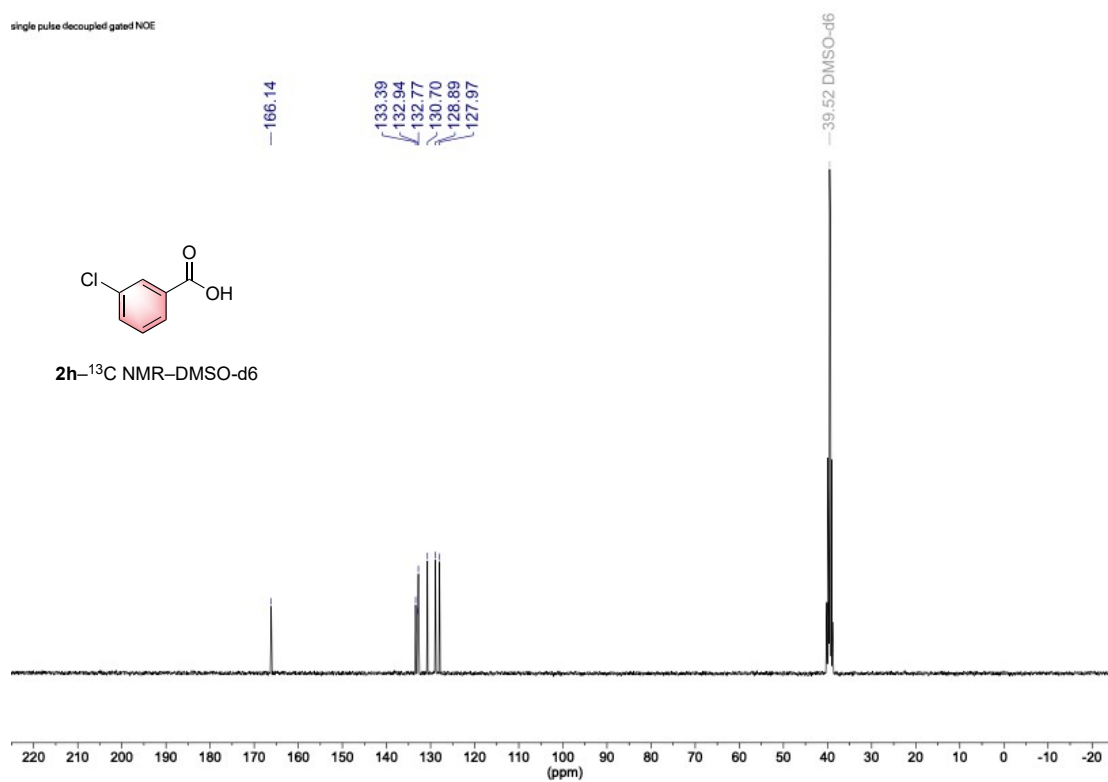

single\_pulse

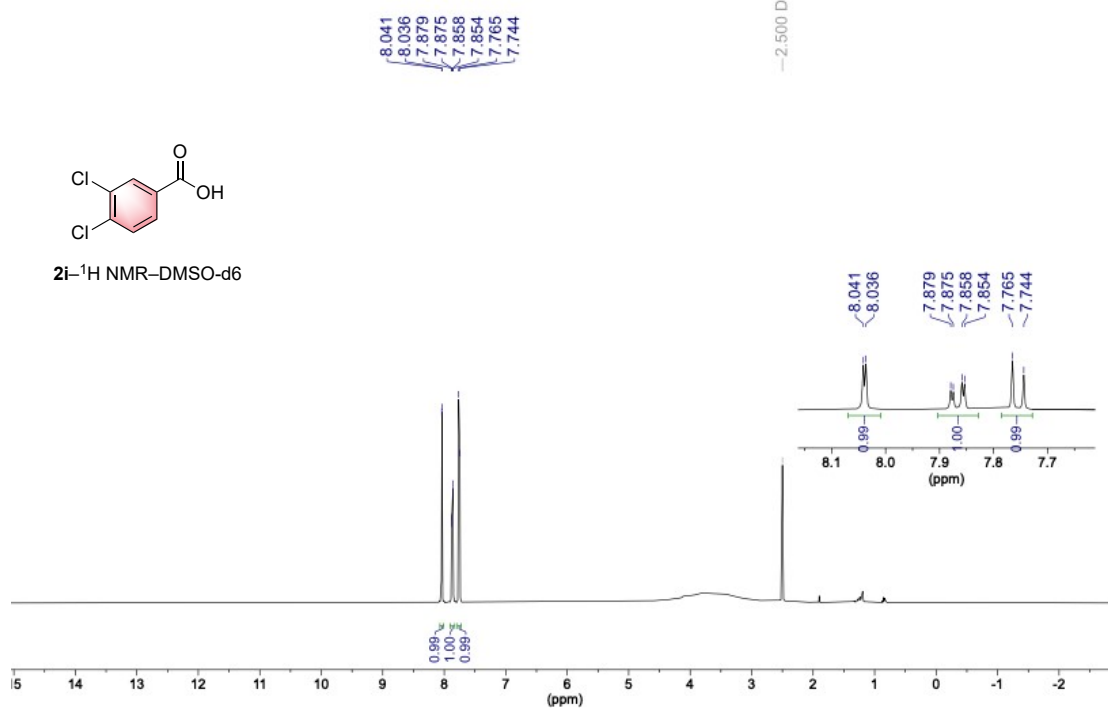

single pulse decoupled gated NOE

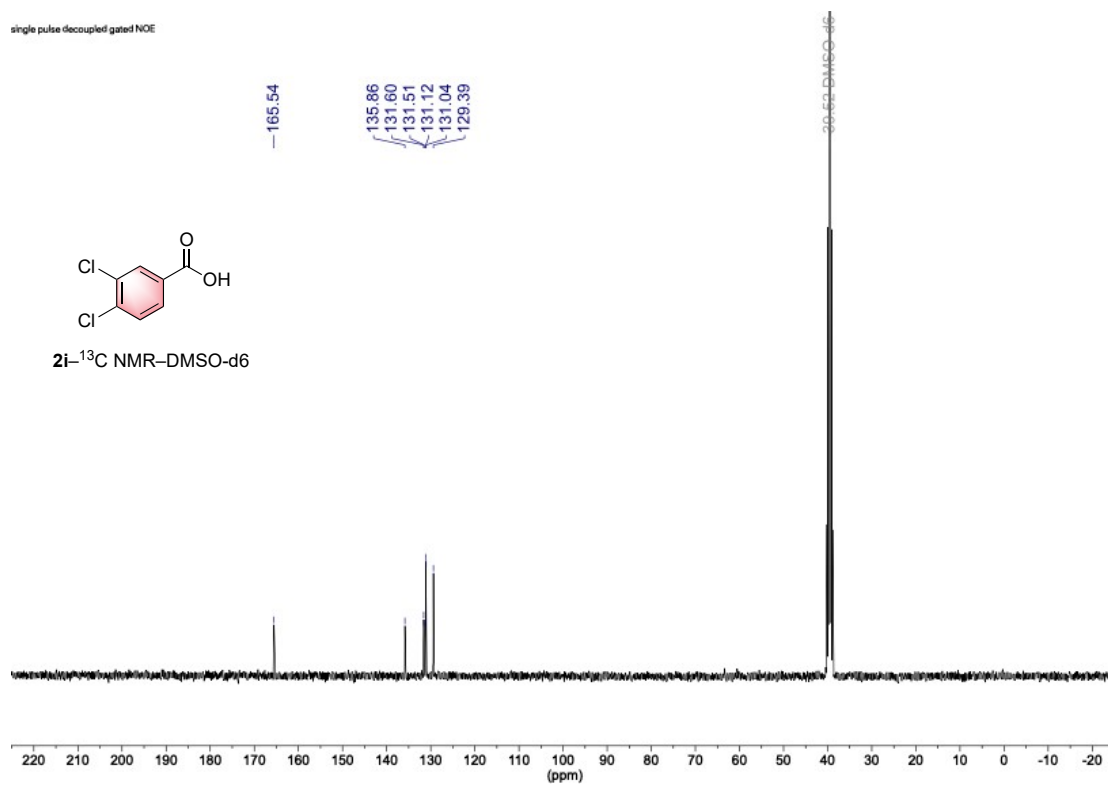

single\_pulse

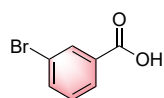

2j-<sup>1</sup>H NMR-DMSO-d6

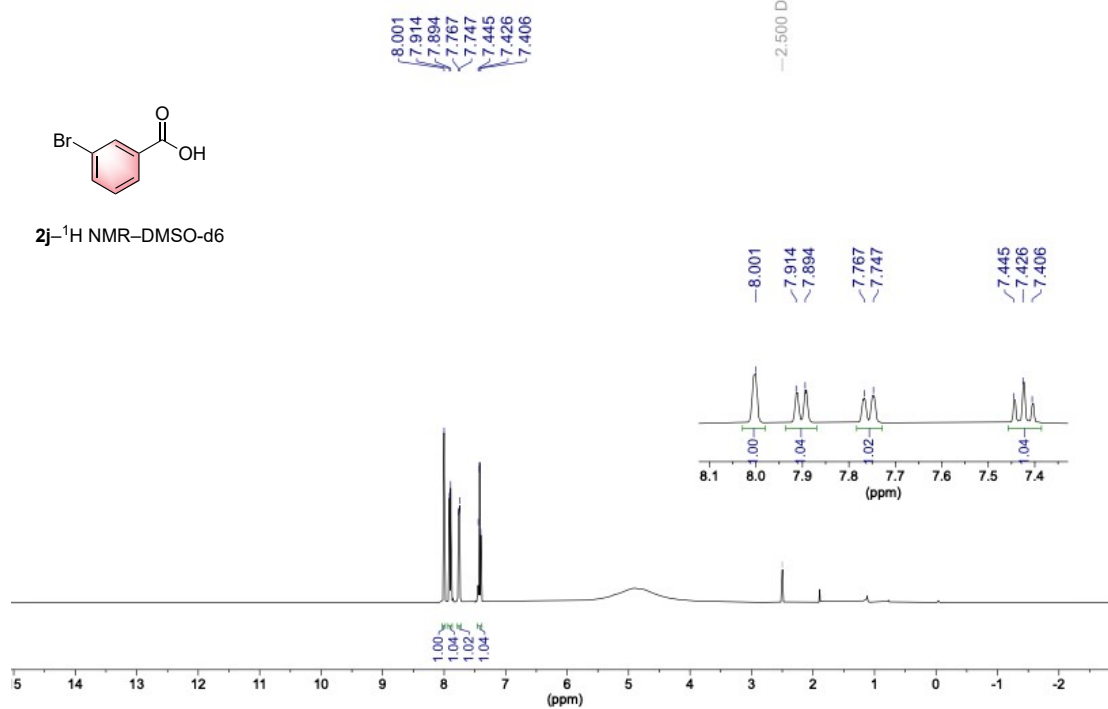

single pulse decoupled gated NOE

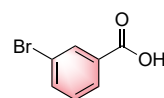

2j-<sup>13</sup>C NMR-DMSO-d6

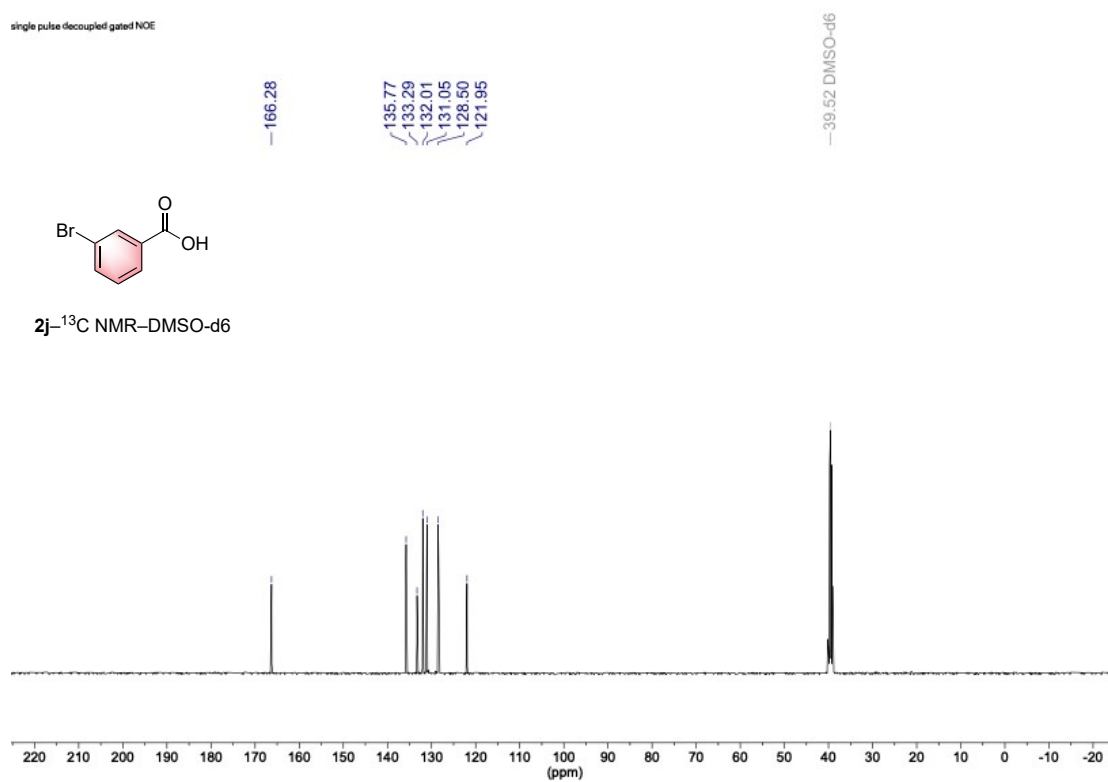

single\_pulse

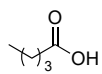

**2k**-<sup>1</sup>H NMR-DMSO-d<sub>6</sub>

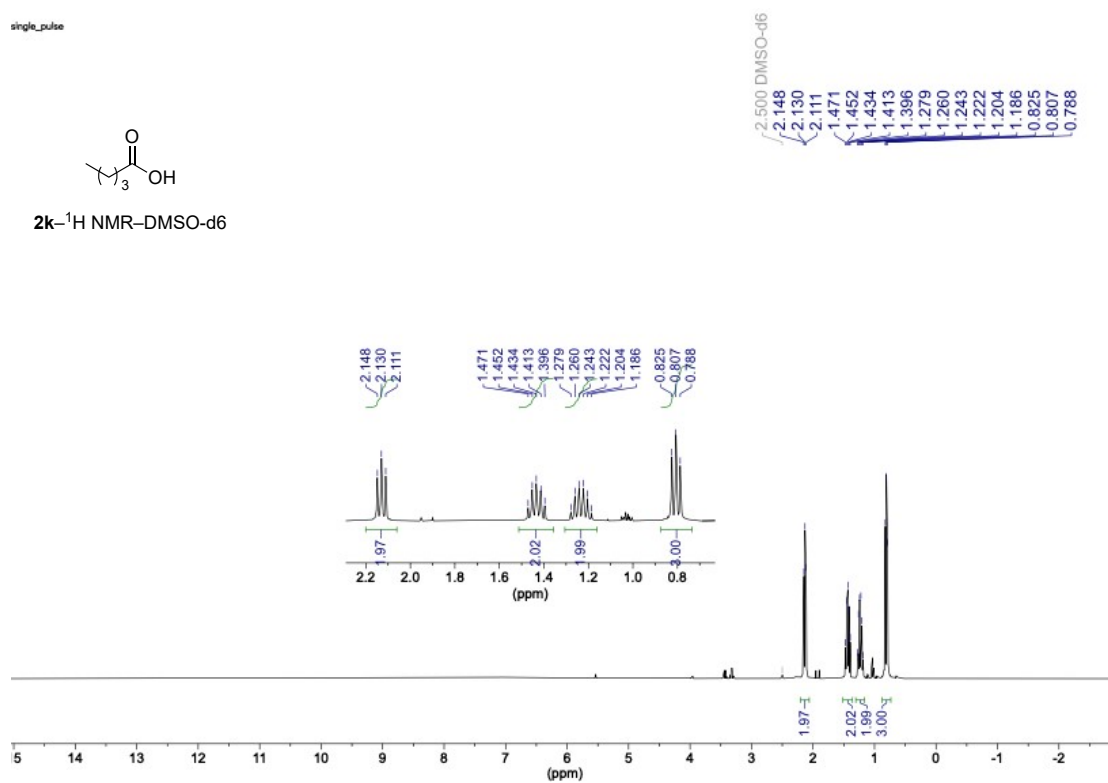

single pulse decoupled gated NOE

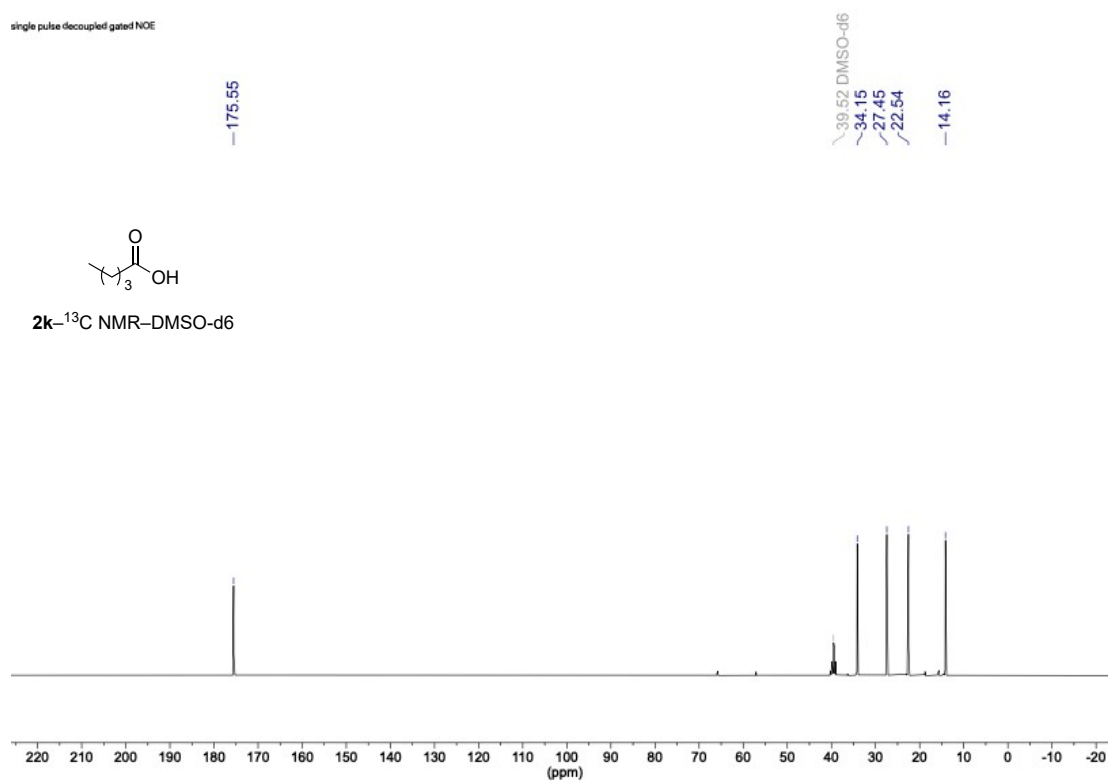

**2k**-<sup>13</sup>C NMR-DMSO-d<sub>6</sub>

single\_pulse

—11.96

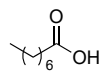

2I-<sup>1</sup>H NMR-DMSO-d6

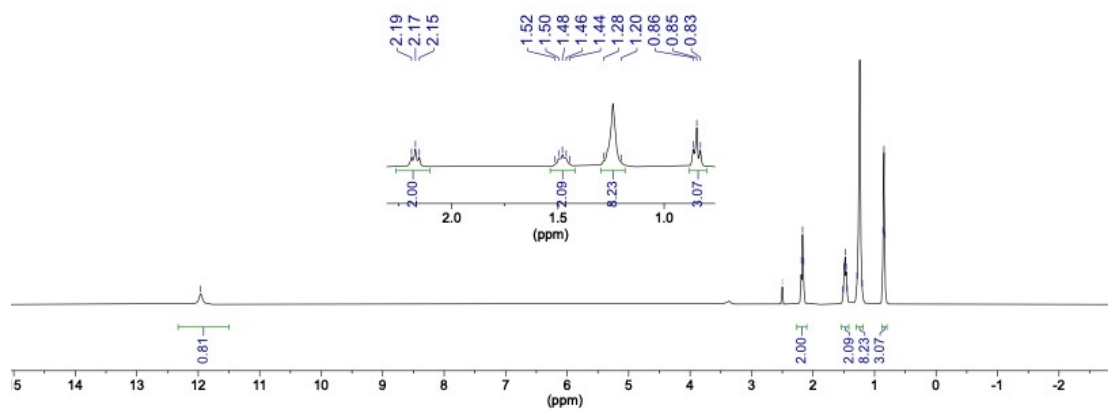

single pulse decoupled gated NOE

—174.48

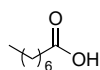

2I-<sup>13</sup>C NMR-DMSO-d6

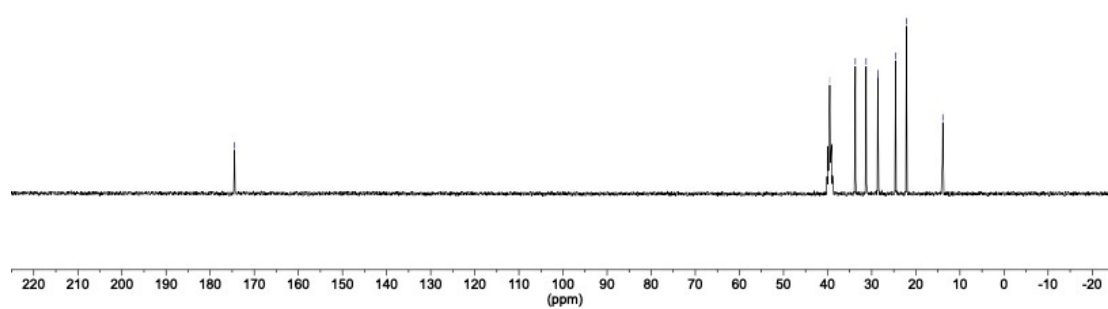

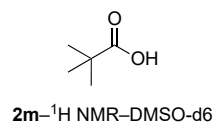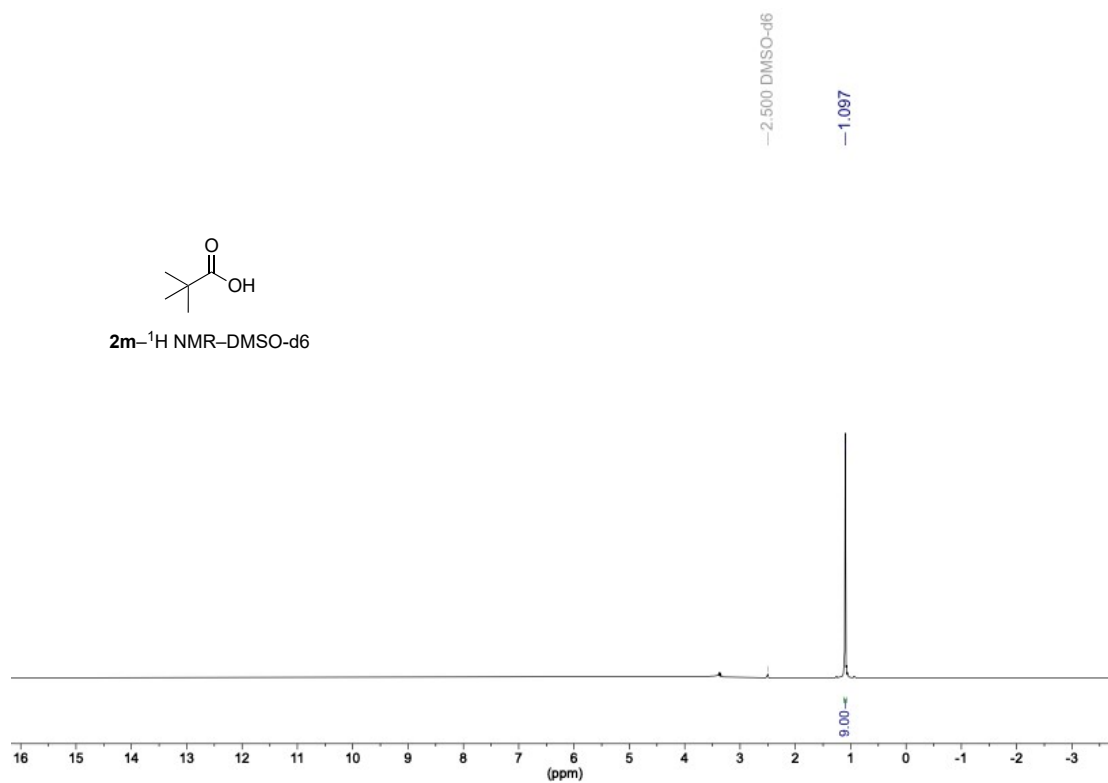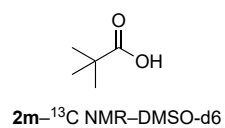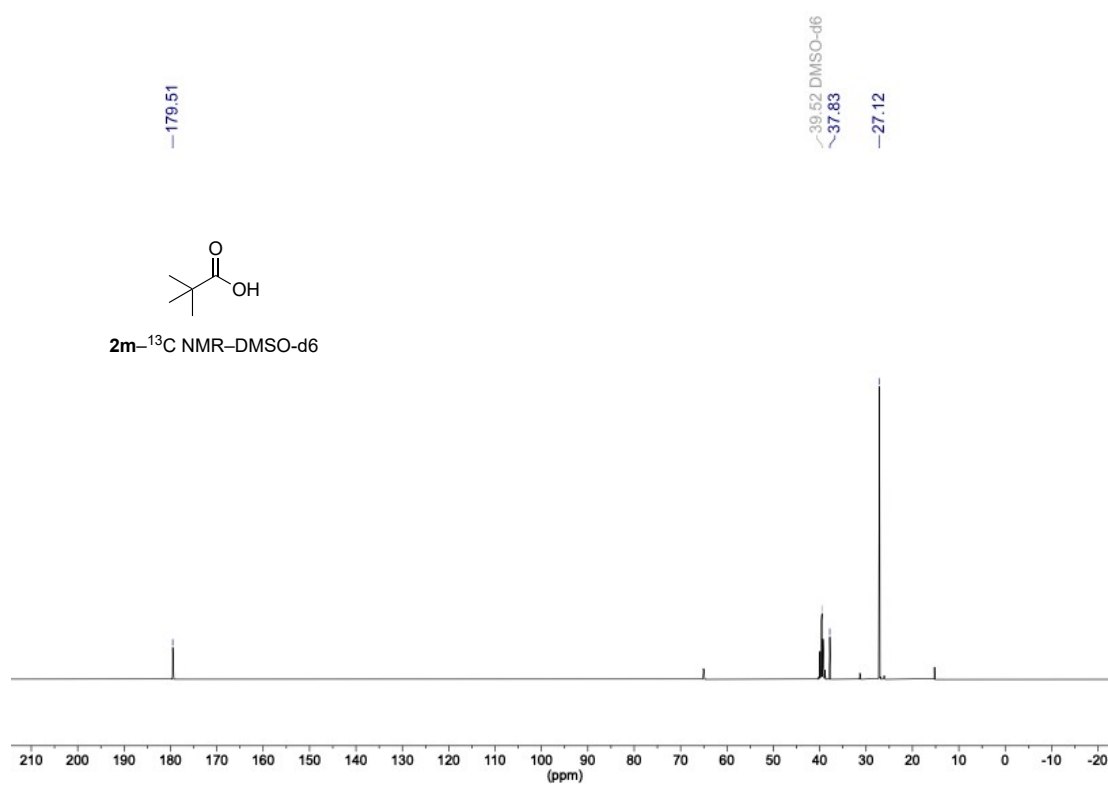



single\_pulse

12.001

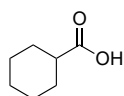

2n-<sup>1</sup>H NMR-DMSO-d<sub>6</sub>

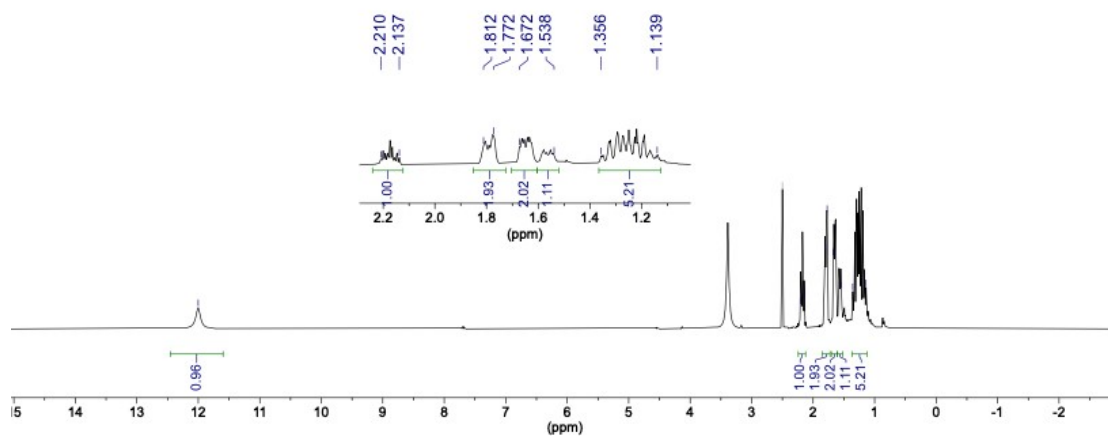

single pulse decoupled gated NOE

176.83

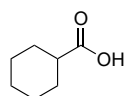

2n-<sup>13</sup>C NMR-DMSO-d<sub>6</sub>

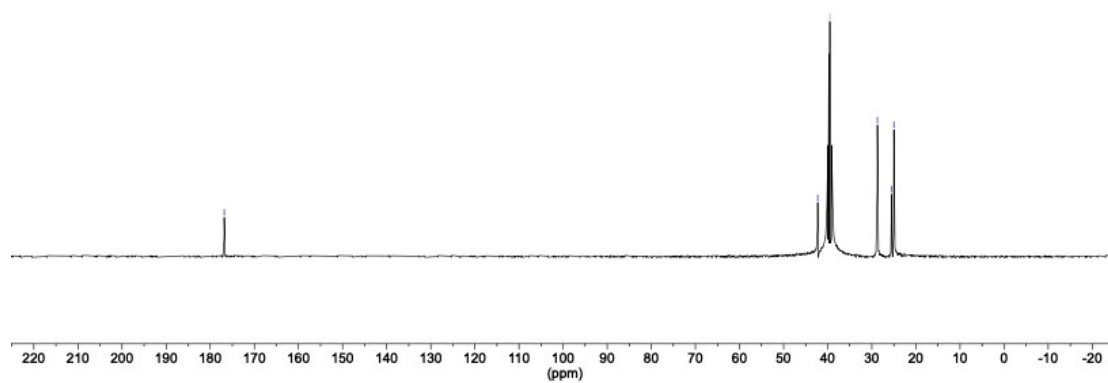

Supplement: d5gc01576f1.pdf [file d5gc01576f1.pdf]
